# Supplementary material for: Vision Screening Assessment (VISA) tool: diagnostic accuracy validation of a novel screening tool in detecting visual impairment among stroke survivors
Source: PubMed Central journal article supplement (PMC7295409; doi:10.1136/bmjopen-2019-033639), 2020-06-11

# BMJ Open

BMJ Open is committed to open peer review. As part of this commitment we make the peer review history of every article we publish publicly available.

When an article is published we post the peer reviewers' comments and the authors' responses online. We also post the versions of the paper that were used during peer review. These are the versions that the peer review comments apply to.

The versions of the paper that follow are the versions that were submitted during the peer review process. They are not the versions of record or the final published versions. They should not be cited or distributed as the published version of this manuscript.

BMJ Open is an open access journal and the full, final, typeset and author-corrected version of record of the manuscript is available on our site with no access controls, subscription charges or pay-per-view fees (<http://bmjopen.bmj.com>).

If you have any questions on BMJ Open's open peer review process please email [info.bmjopen@bmj.com](mailto:info.bmjopen@bmj.com)

# BMJ Open

## The Vision Screening Assessment (VISA) tool - diagnostic accuracy validation of a novel screening tool in detecting visual impairment among stroke survivors.

|                               |                                                                                                                                                                                                                                                                                                                                                                                                                                                                                            |
|-------------------------------|--------------------------------------------------------------------------------------------------------------------------------------------------------------------------------------------------------------------------------------------------------------------------------------------------------------------------------------------------------------------------------------------------------------------------------------------------------------------------------------------|
| Journal:                      | <i>BMJ Open</i>                                                                                                                                                                                                                                                                                                                                                                                                                                                                            |
| Manuscript ID                 | bmjopen-2019-033639                                                                                                                                                                                                                                                                                                                                                                                                                                                                        |
| Article Type:                 | Original research                                                                                                                                                                                                                                                                                                                                                                                                                                                                          |
| Date Submitted by the Author: | 14-Aug-2019                                                                                                                                                                                                                                                                                                                                                                                                                                                                                |
| Complete List of Authors:     | Rowe, Fiona; University of Liverpool, Health Services Research<br>Hepworth, Lauren; University of Liverpool, Health Services Research<br>Howard, Claire; University of Liverpool, Health Services Research<br>Bruce, Alison; Bradford Institute for Health Research, ; University of York, Health Sciences<br>Smerdon, Victoria; Arrowe Park Hospital, Orthoptics<br>Payne, Terry; University of Liverpool, Computer Science<br>Jimmieson, Phil; University of Liverpool, Computer Science |
| Keywords:                     | VISA, Screening, STROKE MEDICINE, Visual impairment, Orthoptics, Detection                                                                                                                                                                                                                                                                                                                                                                                                                 |
|                               |                                                                                                                                                                                                                                                                                                                                                                                                                                                                                            |

SCHOLARONE™  
Manuscripts

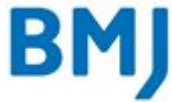

I, the Submitting Author has the right to grant and does grant on behalf of all authors of the Work (as defined in the below author licence), an exclusive licence and/or a non-exclusive licence for contributions from authors who are: i) UK Crown employees; ii) where BMJ has agreed a CC-BY licence shall apply, and/or iii) in accordance with the terms applicable for US Federal Government officers or employees acting as part of their official duties; on a worldwide, perpetual, irrevocable, royalty-free basis to BMJ Publishing Group Ltd ("BMJ") its licensees and where the relevant Journal is co-owned by BMJ to the co-owners of the Journal, to publish the Work in this journal and any other BMJ products and to exploit all rights, as set out in our [licence](#).

The Submitting Author accepts and understands that any supply made under these terms is made by BMJ to the Submitting Author unless you are acting as an employee on behalf of your employer or a postgraduate student of an affiliated institution which is paying any applicable article publishing charge ("APC") for Open Access articles. Where the Submitting Author wishes to make the Work available on an Open Access basis (and intends to pay the relevant APC), the terms of reuse of such Open Access shall be governed by a Creative Commons licence – details of these licences and which [Creative Commons](#) licence will apply to this Work are set out in our licence referred to above.

Other than as permitted in any relevant BMJ Author's Self Archiving Policies, I confirm this Work has not been accepted for publication elsewhere, is not being considered for publication elsewhere and does not duplicate material already published. I confirm all authors consent to publication of this Work and authorise the granting of this licence.

1  
2  
3 **The Vision Screening Assessment (VISA) tool - diagnostic accuracy validation of a novel**  
4 **screening tool in detecting visual impairment among stroke survivors.**  
5  
6  
7

8 Fiona J Rowe<sup>1,2,3</sup>, Lauren R Hepworth<sup>1,3,4</sup>, Claire Howard<sup>1,3</sup>, Alison Bruce<sup>4</sup>, Victoria Smerdon<sup>5</sup>,  
9 Terry Payne<sup>6</sup>, Phil Jimmieson<sup>6</sup>  
10  
11

12  
13 1, Department of Health Services Research, University of Liverpool, UK

14 2, Department of Ophthalmology, Walton Centre for Neurology and Neurosurgery,  
15  
16 Liverpool, UK

17  
18 3, Department of Orthoptics, Salford Royal NHS Foundation Trust, Salford, UK

19 4, Bradford Institute for Health Research, Bradford Teaching Hospitals NHS Foundation Trust,  
20  
21 Bradford, UK

22  
23 5, Department of Orthoptics, Wirral University Teaching Hospital NHS Foundation Trust,  
24  
25 Liverpool, UK

26  
27 6, Department of Computer Science, University of Liverpool, UK  
28  
29  
30

31 **Address for correspondence:**

32 Prof Fiona Rowe

33 Department of Health Services Research

34 Waterhouse Building Block B, 2<sup>nd</sup> floor,

35 University of Liverpool,

36 1-5 Brownlow Street,

37 Liverpool L69 3GL

38 E: [rowef@liverpool.ac.uk](mailto:rowef@liverpool.ac.uk)

39 T: 0151 7944956  
40  
41  
42  
43  
44  
45  
46  
47  
48  
49

50 Disclosures: The authors report no conflict of interest for this study.

51 Funding: This research received no specific grant from any funding agency in the public,  
52 commercial or not-for-profit sectors.  
53

54 Word count: 4187

55 Cover title: Visual impairment screening assessment tool (VISA)

56 Number of figures: 1  
57  
58  
59  
60

1  
2  
3 Number of tables: 4  
4

5 **Keywords:** VISA; Screening; Stroke; Visual impairment; Orthoptics; Detection  
6

7 **Author contributions:** FR provided oversight for the study and led the writing of the paper.  
8 FR, LH, CH, VS and AB contributed to data collection, reviewing the draft paper and  
9 approving the final version. TP and PJ contributed to the development of VISA app software  
10 and its testing, and reviewed the draft paper and approved the final version.  
11  
12  
13  
14

15 **Data access;** Data can be accessed via direct contact with the lead author.  
16  
17  
18  
19

## 20 **Abstract**

21  
22 Purpose: Screening for visual problems in stroke survivors is not standardised. Visual  
23 problems that remain undetected or poorly identified can create unmet needs for stroke  
24 survivors. We report the validation of a new Vision Impairment Screening Assessment (VISA)  
25 tool intended for use by the stroke team to improve identification of visual impairment in  
26 stroke survivors.  
27  
28  
29  
30

31 Methods: We conducted a prospective case cohort comparative study in four centres to  
32 validate the VISA tool against a specialist reference vision assessment. VISA is available in  
33 print or as an app (MHRA regulatory approved); these were used equally for two groups. Both  
34 VISA and the comprehensive reference vision assessment measured case history, visual  
35 acuity, eye alignment, eye movements, visual field and visual inattention. The primary  
36 outcome measure was the presence or absence of visual impairment.  
37  
38  
39  
40  
41

42 Results: Two hundred and twenty two stroke survivors were screened. Specialist reference  
43 vision assessment was by experienced orthoptists. Full completion of screening and reference  
44 vision assessment was achieved for 201 stroke survivors. VISA print was completed for 101  
45 stroke survivors; VISA app was completed for 100. Sensitivity and specificity of VISA print was  
46 97.67% and 66.67% respectively. Overall agreement was substantial;  $K=0.648$ . Sensitivity and  
47 specificity of VISA app was 88.31% and 86.96% respectively. Overall agreement was  
48 substantial;  $K=0.690$ . Lowest agreement was found for screening of eye movement and near  
49 visual acuity.  
50  
51  
52  
53  
54  
55

56 Conclusions: This validation study indicates acceptability of VISA for screening of potential  
57 visual impairment in stroke survivors. Sensitivity and specificity were high indicating the  
58  
59  
60

1  
2  
3 accuracy of this screening tool. VISA is available in print or as an app allowing versatile uptake  
4 across multiple stroke settings.  
5  
6  
7

### 8 ***Strengths and limitations of this study***

- 9  
10  
11
- 12 • Validation of the VISA screening tool in this prospective study shows improved  
13 detection accuracy for detection of stroke-related visual impairment
  - 14 • The study included clinicians involved in stroke care who are not specialists in vision  
15 problems and lack formal eye training.
  - 16 • Where early visual impairment detection occurs, this facilitates prompt referral with  
17 fewer false positives and negatives.
  - 18 • Through process evaluation, clinicians reported acceptability of the VISA screening  
19 tool for its use in screening for presence of vision problems in stroke survivors.
  - 20 • The VISA screening tool may further be of potential use for visual screening in other  
21 care settings such as neuro-rehabilitation.  
22  
23  
24  
25  
26  
27  
28  
29  
30  
31

### 32 **Introduction**

33  
34 The prevalence of overall visual impairment has been estimated at 65% with varying  
35 prevalence reported for specific types of visual impairment (1-3). Figures for incident new  
36 onset visual impairment following stroke are placed at about 60% (4). Given the estimated  
37 100,000 new onset strokes per annum in the UK there are sizeable numbers of stroke  
38 survivors living with stroke-related visual impairment (5).  
39  
40  
41  
42

43 Visual impairment constitutes a considerable comorbidity of stroke. Visual impairment, on its  
44 own or in addition to other stroke-related disabilities, can cause significant impact to quality  
45 of life (6). For many, it results in inability or altered ability to undertake many aspects of daily  
46 activities with impact on return to work, participation in hobbies and family life, and can lead  
47 to social isolation, altered mood and depression (7-9). Interventions for stroke-related visual  
48 impairment are well established (10) but require referral to appropriate eye care services,  
49 which is facilitated through orthoptic service routes (11). Where visual impairment is  
50 identified, this facilitates optimisation of other therapy and early access to vision  
51 rehabilitation.  
52  
53  
54  
55  
56  
57  
58  
59  
60

1  
2  
3 There are issues with how best to identify the presence of visual impairment through stroke  
4 team vision screening and specialist vision assessment (12). Even with screening measures in  
5 place there are also issues reported with provision of care and access to vision services for  
6 stroke survivors who have been identified as having vision problems (13).  
7  
8  
9

10 The overall aim of this study was to validate the Vision Impairment Screening Assessment  
11 (VISA) tool which uses simple established assessments of visual function coupled with  
12 detailed instructions. Our objectives were to test VISA, available in print or as a software  
13 application, against a reference of a specialist vision assessment to determine sensitivity,  
14 specificity, predictive values and inter-rater agreement of results between VISA and specialist  
15 vision assessments.  
16  
17  
18  
19  
20  
21  
22

### 23 **Methods**

24 The development and pilot validation of VISA have been described elsewhere (14). This study  
25 is reported in accordance with the STARD guidelines (15).  
26  
27  
28

### 29 **Design**

30 A prospective case cohort comparative design was used for the validation clinical study  
31 between September 2016 and February 2019. Individuals were suitable for inclusion if they  
32 were 18 years of age or older, had clinical diagnosis of stroke as defined by World Health  
33 Organisation, had the ability to agree to vision screening using verbal or non-verbal  
34 indications of agreement, did not have severe cognitive impairment preventing screening  
35 and did not decline vision screening. This was a convenience sample of participants who  
36 were identified as being eligible from inpatients on the stroke unit. Our inclusion criteria  
37 were intended to be pragmatic and inclusive of as many stroke survivors as possible. The  
38 clinical study was undertaken in accordance with the Tenets of Helsinki with NHS research  
39 ethical approval. Research ethics approval was obtained separately for VISA print  
40 (16/NI/0125) and for VISA app (17/WA/0411). All participants provided informed consent.  
41  
42  
43  
44  
45  
46  
47  
48  
49  
50

### 51 **Setting, Recruitment and Assessment**

52 Recruitment took place across five hospitals (secondary hospital care) in which an orthoptist  
53 was a member of the core acute stroke unit multidisciplinary team (as per national guidelines:  
54 Royal College of Physicians Intercollegiate Stroke Guidelines and British & Irish Orthoptic  
55 Society extended guidelines for stroke practice) (16, 17).  
56  
57  
58  
59  
60

1  
2  
3 For the purpose of this study, vision screening was undertaken with VISA and screening was  
4 defined as the assessment of stroke survivors for the presence of reduced visual function  
5 against pre-set abnormality criteria.  
6  
7

8 Specialist visual assessment was defined as the vision assessment undertaken by an orthoptist  
9 in which detection of visual impairment was coupled with formal diagnosis of the type of  
10 visual condition present. As a minimum this consisted of near and distance LogMAR visual  
11 acuity, cover test, ocular motility assessment, visual field to confrontation and visual  
12 inattention assessment.  
13  
14  
15  
16

17 Each stroke survivor underwent two vision assessments: the routine orthoptic specialist  
18 vision assessment and the VISA screening assessment.  
19  
20

21 VISA was available in print and as a software app. The app was approved by the Medicines  
22 and Healthcare products Regulatory Authority (MHRA: Reference CI/2017/0065) for NHS use  
23 in this study. There are five VISA sections comprising case history, LogMAR visual acuity at  
24 near and distance, eye alignment and movement, visual fields and visual inattention. A  
25 separate section comprising stand-alone user instructions is included. In brief, VISA consists  
26 of five sections. Section 1 comprises a case history with questions and observations of visual  
27 symptoms and signs. Section 2 comprises an assessment of LogMAR visual acuity for near and  
28 distance; monocular or binocular depending on the ability of the patient. Section 3 is an  
29 assessment of eye alignment and eye movements (smooth pursuits) into up, down, right and  
30 left gaze positions. Section 4 is an assessment of visual field, and section 5 is an assessment  
31 of visual inattention including line bisection, clock drawing and a cancellation task. The print  
32 and app versions are identical with the exception of the visual field assessment; in VISA app,  
33 a kinetic visual field assessment is undertaken which, at a test distance of 30cms and a screen  
34 width of 24.6cms, allows an assessment of the 40 degree visual field. The free-to-access VISA  
35 tool is available on; [www.liverpool.ac.uk/psychology-health-and-  
36 society/departments/health-services-research/research/vision/](http://www.liverpool.ac.uk/psychology-health-and-society/departments/health-services-research/research/vision/) (this link will go live on  
37 publication of this paper).  
38  
39  
40  
41  
42  
43  
44  
45  
46  
47  
48  
49  
50  
51

52 The routine orthoptic vision assessment comprised detailed diagnostic assessments of case  
53 history, visual acuity, ocular alignment and movement, visual field and visual perception. This  
54 assessment was undertaken within 24 hours (typically the same day) of the VISA screen – to  
55 minimise effect of potential recovery.  
56  
57  
58  
59  
60



1  
2  
3 The order of the VISA screening and orthoptic vision assessments varied to avoid the effects  
4 of fatigue and bias towards either the screen or specialist assessment. The screener and  
5 orthoptist were blinded to each other's assessments to prevent bias of assessment. The  
6 within-assessment order of testing varied for the specialist assessment. However, the order  
7 of testing within the VISA screen followed a set order of 1) case history, 2) visual acuity, 3)  
8 eye alignment and movement, 4) visual field and 5) visual inattention assessments.  
9

#### 14 ***Statistical methodology and sample size***

16 Results were taken in numerical format from the referral forms completed by both the  
17 screener and orthoptist. The specialist vision assessment was taken as the reference  
18 standard.  
19

21 The primary outcome measure was a binary measure of the presence or absence of visual  
22 impairment (defined as reduced distance vision <0.2, reduced near vision <0.3 (equivalent to  
23 N6), eye movement abnormality, visual field loss, visual perceptual abnormality). The primary  
24 outcome measure was evaluated by Kappa values assessing chance-eliminated agreement  
25 between the results of the VISA screening and orthoptic vision assessment.  
26

27 Secondary outcome measures were the calculation of sensitivity, specificity and predictive  
28 values. Level of sensitivity was estimated as the proportion of patients with visual impairment  
29 as diagnosed by the gold standard clinical examination, that are correctly identified by the  
30 screener, and the corresponding 95% confidence interval was calculated. Level of specificity  
31 was estimated as the proportion of patients without visual impairment that are correctly  
32 identified by the screener, and the corresponding 95% confidence interval. Further, we  
33 calculated the positive and negative predictive values for the VISA screen.  
34

35 For sample size, we applied the principles for diagnostic accuracy studies, and aimed to recruit  
36 a sample of 100 for validation of VISA print and a further sample of 100 for VISA app (18).  
37

#### 47 ***Process evaluation***

49 Process evaluation for acceptability of VISA during the clinical study was collected via clinician  
50 feedback sheets and one-to-one reports from patients. Feedback sheets could be returned at  
51 any time during the study to report any issues with testing alongside obtaining clinician views  
52 based on their use of VISA. Feedback sheets asked the following:  
53

- 56 1. Are the instructions for the various tests clear?
- 57 2. Which instructions should be amended?
- 58 3. What additional instruction information/rewording do you suggest?
- 59
- 60

- 1
- 2
- 3
- 4 4. Which instructions require less information?
- 5 5. Are any tests not useful or difficult to do? (Specify)
- 6
- 7 6. Should any other tests be added in?
- 8
- 9 7. How long does it take you to do the screen?
- 10
- 11 8. Other comments?

12 Comments collected from feedback sheets and reports were collated descriptively.

### 13 ***Patient and Public Involvement***

14  
15  
16  
17 Patients were involved in the design and monitoring of this study. Patients from the VISable  
18 stroke and vision panel were consulted when devising the study plan and conduct. Reports  
19 during the conduct of this study were circulated to the VISable panel for patient monitoring  
20 purposes.  
21  
22  
23

### 24 **Results**

#### 25 ***Completion rate***

26  
27  
28 Two hundred and twenty-two stroke patients received both a VISA screening assessment and  
29 a reference vision assessment (during the period of September 2016 to February 2019).

30  
31 All elements of the VISA screen were attempted by 201 patients. VISA print was used with  
32 122 patients from which complete data was available for 101 for analysis. The mean age of  
33 patients on completion was 70.6 (SD 13.5), 46 were female and 54 male. The reported mean  
34 time of test duration was 23.5 minutes (SD 10.0).  
35  
36  
37

38  
39 VISA app was completed with 100 patients was a mean age of 63.4 (SD 13.4), of which 72  
40 were male and 28 were female.  
41

42  
43 VISA print was fully completed by 91 patients, with the remaining 10 missing one or more  
44 elements (near vision n=5, distance vision n=5, ocular motility n=1, visual fields n=1, visual  
45 inattention n=9). The specialist vision assessment was fully completed by 90 patients, with  
46 the remaining 11 missing one or more elements (near vision n=8, visual inattention n=9).  
47

48  
49 Reasons for inability to complete one or more of the elements were typically recorded as  
50 either cognitive impairment or fatigue. VISA app and specialist vision assessment were fully  
51 completed by all 100 patients. Missing data did not automatically result in failure for that  
52 section, thereby requiring referral. The reason for failure was taken into account; for  
53 example if a section was not completed due to fatigue this would not pragmatically have  
54 resulted in a referral but instead, a retest.  
55  
56  
57  
58  
59  
60

### ***Referral agreement for VISA print***

The agreement of whether to make a referral to specialist eye services based on the results of the VISA print versus those from specialist vision assessment had a Kappa value of 0.648 (substantial agreement) (95% CI 0.424 – 0.872).

Sensitivity of 97.67% and specificity of 60.00% were found. The positive and negative predictive values were 93.33% and 81.82% respectively. These calculations are outlined in Table 1. Agreement was found for 93 participants (nine had no visual impairment, 84 required referral because of failed screening) as outlined in Figure 1.

VISA print produced two false negative and six false positive results. Of the false negative results, both had ocular motility problems, of which one also had reduced near vision. The two ocular motility problems missed were asymptomatic minimal rotary nystagmus and limited elevation. The latter also had reduced near vision at 0.450 LogMAR. For false positive results, three with reduced near vision, two with ocular motility problems and one with both reduced near vision and visual inattention, were detected by screening and found not to be present by the orthoptic vision assessment. The referral relating to reduced near vision all detected N8 level of vision in one or both eyes. The referral relating to visual inattention were detected on the clock drawing element; it was noted by the examiner that the inaccurate completion was likely due to cognitive impairment. The ocular motility problems detected were reported as limitation of vertical gaze and nystagmus.

### ***Test component agreement for VISA print***

The agreements for the individual components between VISA print and specialist vision assessments are outlined in Table 2. The highest levels of agreement were produced for distance visual acuity (0.565) and visual fields (0.504), both with moderate agreement. The lowest level of agreement was produced for near visual acuity (0.236) and ocular motility (0.367), both with fair agreement. Low agreement for ocular motility related to high false positives and false negatives. In ten cases (one with multiple conditions) were not detected (false negative). These comprised of four defects of vertical movement (including one upgaze palsy, two restrictions of elevation and one V-pattern), three cases of nystagmus (including one minimal rotary nystagmus, one gaze-evoked and one end-point nystagmus), and four cases of reduced convergence. The low agreement with near visual acuity related to high false

negatives where 23 cases were not detected – these comprised of ten with 0.4 LogMAR or better, nine between 0.4 and 0.5 LogMAR and three 0.6 LogMAR or worse.

### ***Referral agreement for VISA app***

The agreement of whether to make a referral to specialist eye services based on the results of VISA app versus those from specialist vision assessment had a Kappa value of 0.690 (substantial agreement) (95% CI 0.528-0.851).

Sensitivity of 88.31% and specificity of 86.96% were calculated. The positive and negative predictive values were 95.77% and 68.97% respectively. These calculations are outlined in Table 3.

Agreement was found for 88 participants (20 had no visual impairment, 68 required referral because of failed screening) as outlined in Figure 1. VISA app produced nine false negative and three false positive results. Of the false negative results, four had slightly reduced near vision between 0.3 and 0.4 LogMAR, two had reduced distance vision of 0.3 LogMAR, two had mild visual inattention (one detected on clock cancellation and was the examiners judgement) and one had reduced near vision of 0.4 LogMAR and a visual field defect (partial right superior quadrantanopia detect on confrontation only, but not detected by formal perimetry using binocular Esterman). False positive results (one with reduced distance vision, one with a visual field defect and one with both a visual field defect and visual inattention) were detected by screening and found not to be present by the orthoptic vision assessment. The referral relating to reduce distance vision was 0.4 LogMAR. The referral relating to a visual field defect of general constriction and the visual inattention was detected on the longest line in the line bisection element. The other visual field defect detected was general constriction.

### ***Test component agreement for VISA app***

The agreements for the individual components between VISA app and orthoptic vision assessments are outlined in Table 4. The highest levels of agreement were produced for distance visual acuity (0.783) and visual fields (0.701), both with substantial agreement. The lowest level of agreement was produced for visual inattention (0.323) with fair agreement. The low agreement with visual inattention related to 16 false positives, of which 13 were detected with one of the three tests, 12 with line-bisection, 1 with clock drawing.

### ***Perimetry agreement***

1  
2  
3 Twenty-five participants had formal perimetry using the binocular Esterman programme  
4 rather than confrontation. There was perfect agreement (1.0) of whether a visual field defect  
5 was present between the kinetic visual field test on VISA app versus formal perimetry using  
6 the binocular Esterman programme. Twenty-one had a visual field defect and four were found  
7 to have a normal visual field.  
8  
9  
10  
11  
12  
13

### 14 ***Process evaluation***

15  
16 Information from feedback sheets and detailed notes from interviews were compiled and  
17 grouped for type of feedback. Minimal feedback was obtained during the validation study.  
18 Feedback related to the duration of screening, presentation of tests on the app and referral  
19 guides. One stroke unit noted that VISA could take too long in the hyper-acute stage with  
20 unwell patients. Feedback on app presentation included a change to the clock drawing circle  
21 (to remove lines that might indicate time markers), change to the fixation target for the visual  
22 field test, additional of a nystagmus check on eye movement testing (in addition to its  
23 presence in the case history checklist) and ability to delete erroneous marks on the line  
24 bisection test. For referral guidance, feedback requested the addition of a refer / retest icon  
25 on the patient results page. Further feedback reported greater ease of screening with the app  
26 for those having to use their non-dominant hand because of upper limb motor impairment.  
27 Stroke survivors found it easier to respond using the touch screen than traditional pen and  
28 paper tasks when using their non-dominant hand.  
29  
30  
31  
32  
33  
34  
35  
36  
37  
38  
39  
40  
41

### 42 **Discussion**

43 In this study, we present the VISA screening tool, performed by non-eye trained specialists,  
44 with validation results for the printed version and for the software app. Overall, referral had  
45 sensitivity and specificity of >88% and >60% respectively, positive and negative predictive  
46 values of >93% and >68% respectively, with substantial agreement between VISA screening  
47 and comprehensive orthoptic assessment of about Kappa 0.7. Agreement was lowest for eye  
48 movement screening, near visual acuity and visual inattention whereas all other individual  
49 sections showed higher levels of agreement. Process evaluation aided further refinement of  
50 VISA and, in particular, changes to presentation features on the app version.  
51  
52  
53  
54  
55  
56  
57

58 When designing and using screening tools there is a balance between sensitivity and  
59 specificity for reliable detection of deficits. Low agreement in the VISA sections related to high  
60

1  
2  
3 false positive referrals where VISA screen indicated a fail for ocular motility or visual  
4 inattention. The specialist vision assessment confirmed ocular motility changes which were  
5 classed as 'normal' physiological eye movement patterns such age-related reduced elevation,  
6 and which alone would not have required referral. False positive referrals for visual  
7 inattention occurred where the patient failed to complete the section because of fatigue or  
8 cognitive impairment. Reduced visual acuity was always at a borderline level just above the  
9 fail threshold.

10  
11  
12  
13  
14  
15  
16 False negative referrals are important to consider; failed detection of significant deficits is to  
17 be avoided. Our results showed low numbers of false negatives which included failed  
18 detection of ocular motility defects, reduced visual acuity, visual inattention and visual field  
19 defect. The ocular motility defects were related to asymptomatic limited elevation and  
20 minimal nystagmus which would not have constituted referrals by orthoptic vision  
21 assessment. Reduced visual acuity, similar to the false positive results, was always close to  
22 the pass/fail threshold. Arguably, this is an ideal call for retest rather than refer. One case of  
23 mild visual inattention was not passed by VISA app where the diagnosis had been made by  
24 clinical observation. One visual field defect related to a peripheral field loss; a defect that  
25 could not be detected by the central testing area of VISA app.

26  
27  
28  
29  
30  
31  
32  
33  
34 Specificity was higher when using VISA app compared to VISA print. This is likely due to the  
35 staff mix using VISA. VISA print was used solely by members of the stroke team and often  
36 without any formal vision training. VISA app was used by a mix of stroke team members but  
37 also orthoptists. Accuracy was likely enhanced by involvement of the latter.

38  
39  
40  
41  
42  
43  
44  
45  
46  
47  
48  
49  
50  
51  
52  
53  
54  
55  
56  
57  
58  
59  
60  
VISA print and app provide a vision screen across the main categories of potential visual  
impairment following stroke. Besides a case history section, screening includes visual acuity,  
eye position and movements, visual fields and visual inattention. There are potential  
advantages for using either the manual tool or the app. Some clinicians and stroke survivors  
may prefer and respond better to use of traditional testing options inclusive of pen and paper  
tasks. The recording charts are completed during the testing period and can be entered in  
hospital case notes immediately. The app produces a PDF file of results which has to be  
printed before entry in hospital case notes. Conversely, the PDF file is an advantage for  
electronic hospital records. Further, the app provides a constant background illumination for  
screening assessments whereas the manual is used under variable lighting conditions  
dependent on wherever the screening is undertaken. The app uses a kinetic central visual

1  
2  
3 field assessment that is run as a standardised test which reduces examiner bias – a bias that  
4 persists for confrontation visual field assessment.  
5

6  
7 A systematic review of screening options for post-stroke visual impairment reported vision  
8 screening checklists and stroke screening tools (e.g. National Institute for Health Stroke Scale)  
9 which include elements of vision assessment, however not all potential visual impairments  
10 are screened (19). Past vision screening publications have reported the results of vision  
11 'checklists' – lists of information gathered from questioning the patient, observations or from  
12 data documented in the case notes. The Vision In Stroke (VIS) reported checklist screening in  
13 915 stroke survivors with sensitivity of 0.42, specificity of 0.52 and agreement against a  
14 reference standard of 0.428 (-0.048 to 0.019 CI: Kappa) (2, 12). An Australian study reported  
15 the use of a checklist for detection of eye conditions and vision defects in 100 stroke survivors  
16 with 69% accuracy and intra-class correlation of 0.84 (0.77-0.89 CI) (20). More recently, a  
17 vision screening app (available on android platforms) was developed for use with stroke  
18 survivors (StrokeVision app) with sections assessing visual acuity, visual fields and visual  
19 inattention (21). This was validated with a cohort of 45 stroke survivors with sensitivities  
20 across the various sections of 50-79% and specificities of 87-98%. The specificities reported  
21 are higher than those from our VISA study but likely reflect the use of the StrokeVision app  
22 by fully trained research assistants versus the VISA completion by members of the stroke  
23 multidisciplinary team who only followed the in-built screening instructions.  
24  
25  
26  
27  
28  
29  
30  
31  
32  
33  
34  
35  
36  
37

38 Overall, vision tools/apps provide a more extensive screening of vision with greater accuracy  
39 than vision checklists. However, there are issues with how best to identify the presence of  
40 visual impairment through stroke team vision screening and specialist vision assessment (19,  
41 22). Even with screening measures in place there are also issues reported with provision of  
42 care and access to vision services for stroke survivors who have been identified as having  
43 vision problems (13).  
44  
45  
46  
47  
48

49 An ideal stroke vision service follows recommendations from the National Clinical Guidelines  
50 for Stroke which specify orthoptists as core members of the acute stroke team and screen all  
51 stroke survivors prior to discharge (16). Despite consistent findings that inclusion of vision  
52 services within the multi-disciplinary team (MDT) is highly beneficial, such visual assessment  
53 is not common and services are inconsistent throughout the UK. Stepped models of care must  
54 be considered to meet the needs of stroke survivors against the context of local service  
55 capacity. Access to orthoptic services on acute stroke units enables faster provision of vision  
56  
57  
58  
59  
60

1  
2  
3 screening. The earlier assessment time-point reported for the IVIS study is important as it  
4 shows the feasibility and acceptability of early visual assessment within 3 days of stroke onset  
5 for at least half of stroke survivors and within 1 week of stroke onset for the majority (4). This  
6 in turn allows early detection of visual impairment and sharing of the functional significance  
7 of this with the patients, carers and stroke teams. Furthermore, early assessment leads to  
8 early intervention which has potential impact on general rehabilitation where visual function  
9 can be improved (2, 3, 10). In the absence of orthoptic services, further stepped down models  
10 of care include the use of screening tools or screening checklists.  
11  
12

13  
14  
15  
16  
17  
18  
19 Such screening methods cannot replace the accuracy of a reference, specialist vision  
20 assessment. However, they serve an important purpose of obtaining a standardised screen in  
21 the absence of on-site specialist vision services and are better than no or non-standardised  
22 assessments by non-eye trained clinicians. In such instances, we advise the use of a screening  
23 tool. The advantages of VISA print and app are their validation in a real-world pragmatic study  
24 conducted in acute stroke units and used by non-eye trained clinicians. Clinicians used the in-  
25 built standalone instructions – designed to avoid the need of regular specialist vision training  
26 which can be difficult to access or provide. Further, the app is MHRA approved for clinical  
27 assessment; an important requirement for NHS adoption. The availability of VISA as a manual  
28 and as an app facilitates use alongside paper-based records or integration with electronic  
29 patient record systems.  
30  
31  
32  
33  
34  
35  
36  
37  
38  
39

40  
41  
42  
43  
44  
45  
46  
47  
48  
49  
50  
51  
52  
53  
54  
55  
56  
57  
58  
59  
60  
Vision checklists have been shown to have a low sensitivity and specificity, and an over-  
reliance on the report of visual symptoms (2, 12). The VISA print and app offer an intermediate  
measure between vision checklists and orthoptic specialist vision services with greater  
accuracy than vision checklists but lacking the accuracy of orthoptic assessments and the  
immediate access to management of visual problems provided by orthoptic stroke unit  
services. The VISA print/app does not preclude the use of vision checklists however. For some  
stroke survivors who are very unwell acutely and/or lack sufficient cognition and  
communication, simpler vision checklists are quick and easy to use in such circumstances and  
remain more accurate than no vision screen at all.

There are some limitations to consider for this study. The VISA screening tool was used on  
acute stroke units. There was no validation of the tool in community settings. However, there



1  
2  
3 is little reason to think it would be of less or use or accuracy when used in other stroke  
4 settings. Test-retest variability of the VISA screening tool was not evaluated during this study  
5 as this would have caused too high a burden of assessment on participants.  
6  
7  
8  
9

## 10 **Conclusions**

11  
12 Validation of the VISA screening tool in either print or app format shows improved detection  
13 accuracy for detection of stroke-related visual impairment by clinicians involved in stroke care  
14 who are not specialists in vision problems and lack formal eye training. Where early visual  
15 impairment detection occurs, this facilitates prompt referral with fewer false positives and  
16 negatives. Clinicians reported acceptability of the VISA screening tool for its use in screening  
17 for presence of vision problems in stroke survivors. Referral sensitivity of >88% and specificity  
18 of >60% were found for the VISA screening with substantial inter-rater agreement for referral  
19 between VISA screening and specialist vision assessments. The VISA screening tool provides  
20 a standardised and validated method to screen for visual problems following stroke and may  
21 further be of potential use for visual screening in other care settings such as neuro-  
22 rehabilitation.  
23  
24  
25  
26  
27  
28  
29  
30  
31  
32  
33

## 34 **Acknowledgements**

35  
36 We thank the VISable panel for their involvement in the design and monitoring of this study.  
37  
38 We thank the patients and staff at Arrowse Park Hospital, Bradford Teaching Hospital,  
39 Manchester University Hospital, Salford Royal Hospital and the Walton Centre; specifically  
40 Felicity Hale, Jennifer Lawrence, Sam Campbell, Claire Fowler, Imtiaz Nazir, Laura Stubbs,  
41 Abigail Kerr, Stephanie Wolff, Kim Cochrane, Tamsin Steward, Ella Henry, Carmel Noonan and  
42 Hayley Draper.  
43  
44  
45  
46  
47  
48

## 49 **References**

- 50  
51 1. Hepworth LR, Rowe FJ, Walker MF, et al. Post-stroke visual impairment: a systematic literature  
52 review of types and recovery of visual conditions. *Ophthalmology Research*. 2016;5(1).
- 53 2. Rowe F, VIS writing group. Vision In Stroke cohort: profile overview of visual impairment. *Brain*  
54 and Behavior. 2017.
- 55 3. Jones SA, Shinton RA. Improving outcome in stroke patients with visual problems. *Age and*  
56 *Ageing*. 2006;35(6):560-5.
- 57 4. Rowe FJ, Hepworth LR, Howard C, et al. High incidence and prevalence of visual problems after  
58 acute stroke: an epidemiology study with implications for service delivery. *PLoS One*. 2019;14(3).  
59  
60

- 1
  - 2
  - 3
  - 4
  - 5
  - 6
  - 7
  - 8
  - 9
  - 10
  - 11
  - 12
  - 13
  - 14
  - 15
  - 16
  - 17
  - 18
  - 19
  - 20
  - 21
  - 22
  - 23
  - 24
  - 25
  - 26
  - 27
  - 28
  - 29
  - 30
  - 31
  - 32
  - 33
  - 34
  - 35
  - 36
  - 37
  - 38
  - 39
  - 40
  - 41
  - 42
  - 43
  - 44
  - 45
  - 46
  - 47
  - 48
  - 49
  - 50
  - 51
  - 52
  - 53
  - 54
  - 55
  - 56
  - 57
  - 58
  - 59
  - 60
5. Stroke Association. State of the nation: stroke statistics 2018 [Available from: [https://www.stroke.org.uk/system/files/sotn\\_2018.pdf](https://www.stroke.org.uk/system/files/sotn_2018.pdf)].
6. Hepworth LR, Rowe FJ. Visual impairment following stroke - the impact on quality of life: a systematic review. *Ophthalmology Research*. 2016;5(2):1-15.
7. Tsai S-Y, Cheng C-Y, Hsu W-M, et al. Association between visual impairment and depression in the elderly. *Journal of Formosan Medical Association*. 2003;102(2):86-90.
8. Chen CS, Lee AW, Clarke G, et al. Vision-related quality of life in patients with complete homonymous hemianopia post stroke. *Topics in Stroke Rehabilitation*. 2009;16(6):445-53.
9. Gall C, Lucklum J, Sabel BA, et al. Vision- and health-related quality of life in patients with visual field loss after postchiasmatic lesions. *Investigative Ophthalmology and Vision Science*. 2009;50(6):2765-76.
10. Hanna KL, Hepworth LR, Rowe FJ. The treatment methods for post-stroke visual impairment: a systematic review. *Brain and Behavior*. 2017;7(5).
11. Rowe F, Walker M, Rockliffe J, et al. Delivery of high quality stroke and vision care: experiences of UK services. *Disability and Rehabilitation*. 2016;38(8):813-7.
12. Rowe FJ, VIS Group UK. Accuracy of referrals for visual assessment in a stroke population. *Eye*. 2011;25(2):161-7.
13. Rowe FJ, Walker M, Rockliffe J, et al. Care provision for poststroke visual impairment. *Journal of Stroke and Cerebrovascular Diseases*. 2015;24(6):1131-44.
14. Rowe FJ, Hepworth LR, Hanna KL, et al. Visual Impairment Screening Assessment (VISA) tool: pilot validation. *BMJ Open*. 2018.
15. Cohen JF, Korevaar DA, Altman DG, et al. STARD 2015 guidelines for reporting diagnostic accuracy studies: explanation and elaboration. *BMJ Open*. 2016;6(e012799).
16. Intercollegiate Stroke Working Party. National clinical guideline for stroke. 5th ed. London: Royal College of Physicians; 2016.
17. British and Irish Orthoptic Society. Competency standards and professional practice guidelines: extended practitioner role London: British and Irish Orthoptic Society;; 2018.
18. Bland JM, Altman DG. Statistical methods for assessing agreement between two methods of clinical measurement. *Lancet*. 1986;327(8476):307-10.
19. Hanna KL, Hepworth LR, Rowe FJ. Screening methods for post-stroke visual impairment: a systematic review. *Disability and Rehabilitation*. 2017;39(25):2531-43.
20. Jolly N, Macfarlane A, Heard R. Towards gaining the best information about vision to assist the recovery of a patient with stroke. *Strabismus*. 2013;21(2):145-9.
21. Quinn TJ, Livingstone I, Weir A, et al. Accuracy and feasibility of an android-based digital assessment tool for post stroke visual disorders - the StrokeVision app. *Front Neurology*. 2018;9(146).
22. Rowe FJ. Who sees visual impairment following stroke? *Strabismus*. 2010;18(2):37-40.

**Table 1:** Calculations of sensitivity, specificity and predictive values for VISA print

| <i>Positive</i>                                                          |                                    |
|--------------------------------------------------------------------------|------------------------------------|
| True positive, i.e. visual impairment present and referred               | 84                                 |
| False negative, i.e. visual impairment present but not referred          | 2                                  |
| <i>Negative</i>                                                          |                                    |
| False positive, i.e. visual impairment not present but referred          | 6                                  |
| True negative, i.e. visual impairment not present and not referred       | 9                                  |
| <i>Output</i>                                                            |                                    |
| Sensitivity (true positive/true positive + false negative)               | 97.67%<br>(95% CI: 91.85 – 99.72%) |
| Specificity (true negative/false positive + true negative)               | 60.00%<br>(95% CI: 32.29 – 83.66%) |
| Positive predictive value (true positive/false positive + true positive) | 93.33%<br>(95% CI: 88.27 – 96.30%) |
| Negative predictive value (true negative/false negative + true negative) | 81.82%<br>(95% CI: 51.83 – 94.95%) |

**Table 2:** Summary of agreement between VISA print and specialist vision assessment for referral to specialist eye services and individual components

| Element of testing     | Agreement | False negative | False positive | Kappa value (95% CI)  |
|------------------------|-----------|----------------|----------------|-----------------------|
| Referral               | 93        | 2              | 6              | 0.648 (0.424 – 0.872) |
| Near visual acuity     | 65        | 23             | 12             | 0.236 (0.045 – 0.427) |
| Distance visual acuity | 79        | 9              | 13             | 0.565 (0.405 – 0.725) |
| Ocular alignment       | 89        | 5              | 7              | 0.388 (0.110 – 0.667) |
| Ocular motility        | 72        | 10             | 19             | 0.367 (0.181 – 0.553) |
| Visual fields          | 76        | 7              | 18             | 0.504 (0.339 – 0.668) |
| Visual inattention     | 74        | 4              | 21             | 0.500 (0.340 – 0.659) |

**Table 3:** Calculations of sensitivity, specificity and predictive values for VISA app

| <i>Positive</i>                                                          |                                    |
|--------------------------------------------------------------------------|------------------------------------|
| True positive, i.e. visual impairment present and referred               | 68                                 |
| False negative, i.e. visual impairment present but not referred          | 9                                  |
| <i>Negative</i>                                                          |                                    |
| False positive, i.e. visual impairment not present but referred          | 3                                  |
| True negative, i.e. visual impairment not present and not referred       | 20                                 |
| <i>Output</i>                                                            |                                    |
| Sensitivity (true positive/true positive + false negative)               | 88.31%<br>(95% CI: 78.97 – 94.51%) |
| Specificity (true negative/false positive + true negative)               | 86.96%<br>(95%CI: 66.41 – 97.22%)  |
| Positive predictive value (true positive/false positive + true positive) | 95.77%<br>(95% CI: 88.72 – 98.49%) |
| Negative predictive value (true negative/false negative + true negative) | 68.97%<br>(95% CI: 54.10 – 80.73%) |

**Table 4:** Summary of agreement between VISA app and specialist vision assessment for referral to specialist eye services and individual components.

| <b>Element of testing</b> | <b>Agreement</b> | <b>False negative</b> | <b>False positive</b> | <b>Kappa value (95% CI)</b> |
|---------------------------|------------------|-----------------------|-----------------------|-----------------------------|
| Referral                  | 88               | 9                     | 3                     | 0.690 (0.528 – 0.851)       |
| Near visual acuity        | 77               | 19                    | 3                     | 0.416 (0.227 – 0.605)       |
| Distance visual acuity    | 90               | 6                     | 4                     | 0.783 (0.656 – 0.910)       |
| Visual fields             | 85               | 3                     | 12                    | 0.701 (0.564 – 0.838)       |
| Visual inattention        | 78               | 6                     | 16                    | 0.323 (0.108 – 0.538)       |

Figure 1: Flow diagram of participant outcome for VISA screening and orthoptic full assessment.

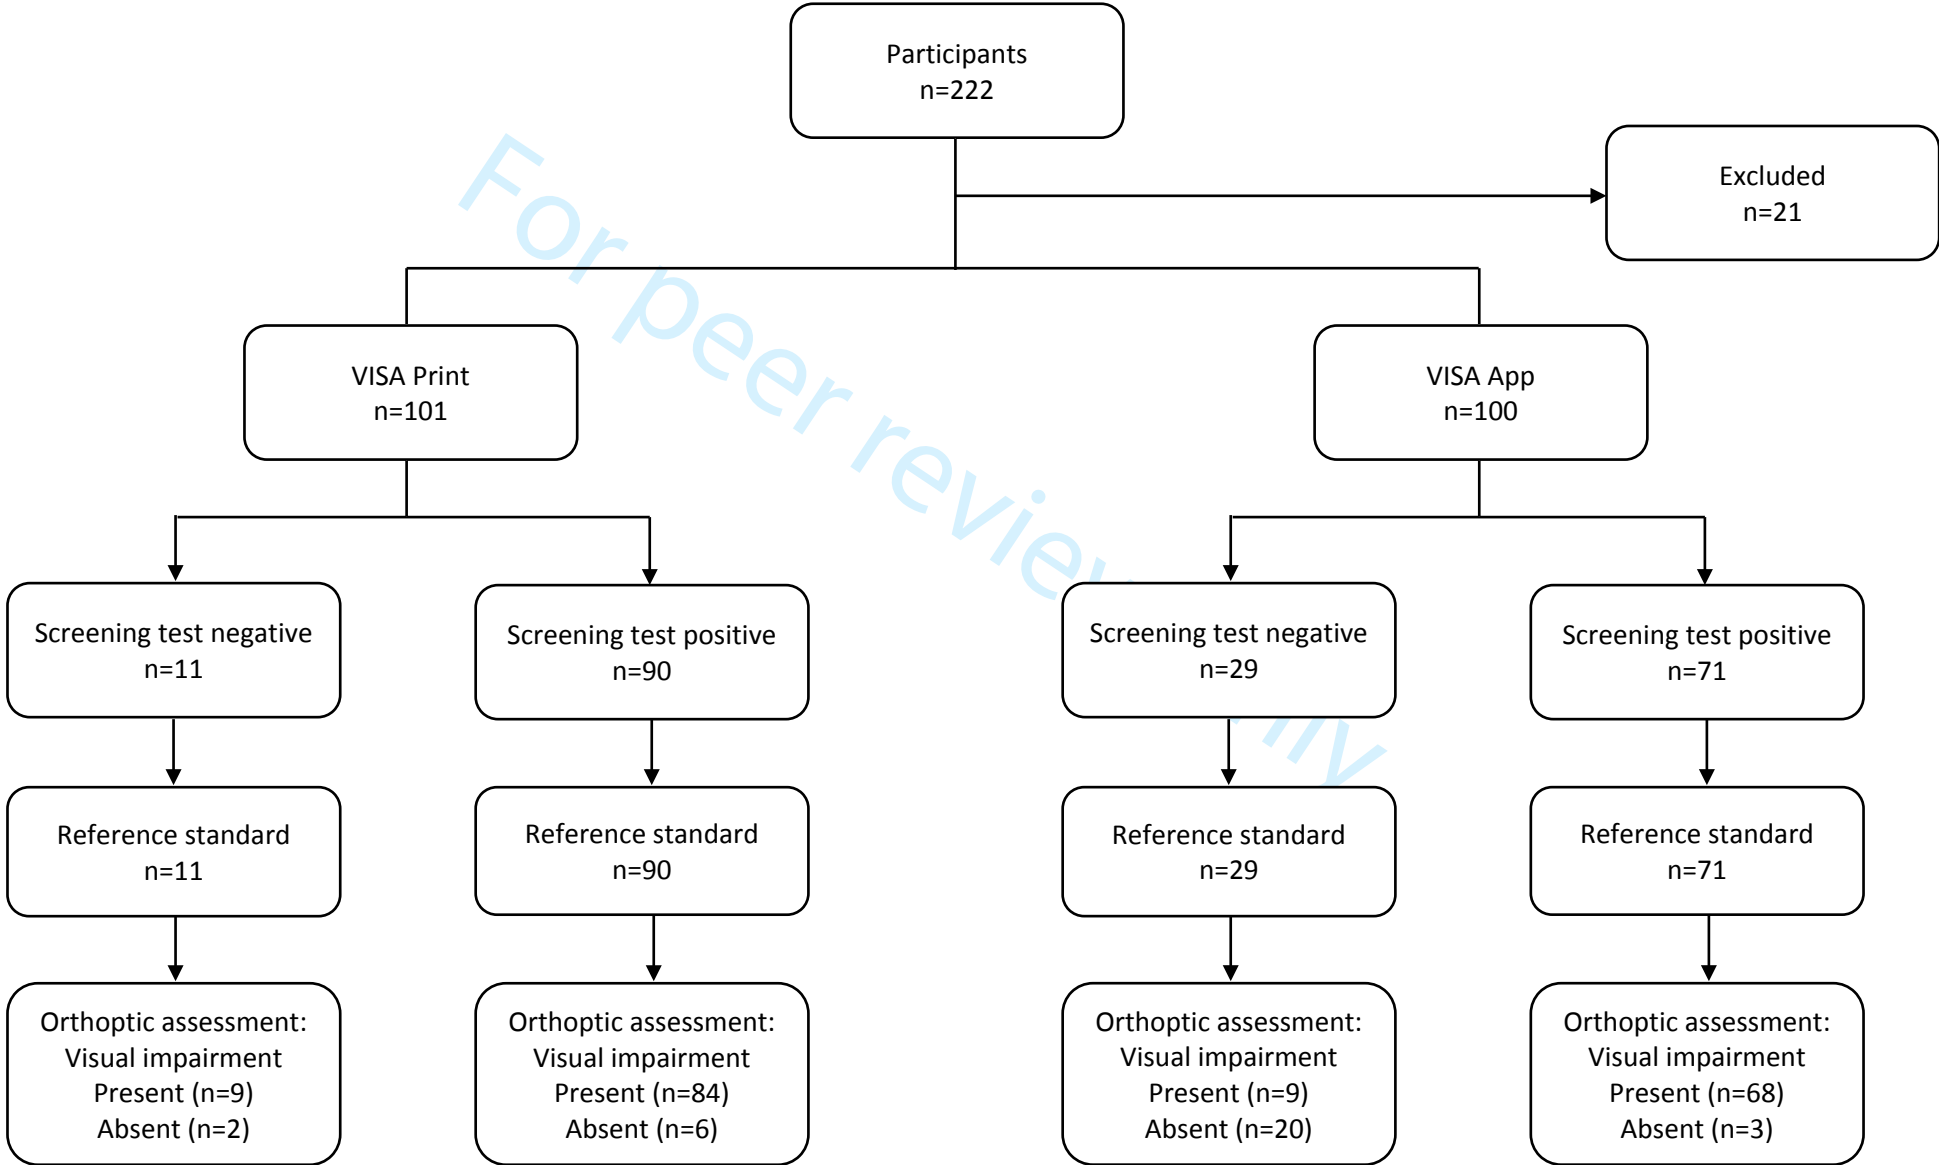

| 1  | Section & Topic          | No  | Item                                                                                                                                                   | Reported on page #                |
|----|--------------------------|-----|--------------------------------------------------------------------------------------------------------------------------------------------------------|-----------------------------------|
| 2  | <b>TITLE OR ABSTRACT</b> |     |                                                                                                                                                        |                                   |
| 3  |                          | 1   | Identification as a study of diagnostic accuracy using at least one measure of accuracy (such as sensitivity, specificity, predictive values, or AUC)  | 1                                 |
| 4  |                          |     |                                                                                                                                                        |                                   |
| 5  | <b>ABSTRACT</b>          |     |                                                                                                                                                        |                                   |
| 6  |                          | 2   | Structured summary of study design, methods, results, and conclusions (for specific guidance, see STARD for Abstracts)                                 | 2                                 |
| 7  |                          |     |                                                                                                                                                        |                                   |
| 8  | <b>INTRODUCTION</b>      |     |                                                                                                                                                        |                                   |
| 9  |                          | 3   | Scientific and clinical background, including the intended use and clinical role of the index test                                                     | 3                                 |
| 10 |                          | 4   | Study objectives and hypotheses                                                                                                                        | 3                                 |
| 11 |                          |     |                                                                                                                                                        |                                   |
| 12 | <b>METHODS</b>           |     |                                                                                                                                                        |                                   |
| 13 | <i>Study design</i>      | 5   | Whether data collection was planned before the index test and reference standard were performed (prospective study) or after (retrospective study)     | 3                                 |
| 14 |                          |     |                                                                                                                                                        |                                   |
| 15 | <i>Participants</i>      | 6   | Eligibility criteria                                                                                                                                   | 3-4                               |
| 16 |                          | 7   | On what basis potentially eligible participants were identified (such as symptoms, results from previous tests, inclusion in registry)                 | 4                                 |
| 17 |                          | 8   | Where and when potentially eligible participants were identified (setting, location and dates)                                                         | 3-4                               |
| 18 |                          | 9   | Whether participants formed a consecutive, random or convenience series                                                                                | 4                                 |
| 19 |                          |     |                                                                                                                                                        |                                   |
| 20 | <i>Test methods</i>      | 10a | Index test, in sufficient detail to allow replication                                                                                                  | 4                                 |
| 21 |                          | 10b | Reference standard, in sufficient detail to allow replication                                                                                          | 4                                 |
| 22 |                          | 11  | Rationale for choosing the reference standard (if alternatives exist)                                                                                  | N/A                               |
| 23 |                          | 12a | Definition of and rationale for test positivity cut-offs or result categories of the index test, distinguishing pre-specified from exploratory         | 3 – in previously published paper |
| 24 |                          | 12b | Definition of and rationale for test positivity cut-offs or result categories of the reference standard, distinguishing pre-specified from exploratory | 5                                 |
| 25 |                          | 13a | Whether clinical information and reference standard results were available to the performers/readers of the index test                                 | 5                                 |
| 26 |                          | 13b | Whether clinical information and index test results were available to the assessors of the reference standard                                          | 5                                 |
| 27 |                          |     |                                                                                                                                                        |                                   |
| 28 | <i>Analysis</i>          | 14  | Methods for estimating or comparing measures of diagnostic accuracy                                                                                    | 5                                 |
| 29 |                          | 15  | How indeterminate index test or reference standard results were handled                                                                                | 6                                 |
| 30 |                          | 16  | How missing data on the index test and reference standard were handled                                                                                 | 6                                 |
| 31 |                          | 17  | Any analyses of variability in diagnostic accuracy, distinguishing pre-specified from exploratory                                                      | N/A                               |
| 32 |                          | 18  | Intended sample size and how it was determined                                                                                                         | 5                                 |
| 33 |                          |     |                                                                                                                                                        |                                   |
| 34 | <b>RESULTS</b>           |     |                                                                                                                                                        |                                   |
| 35 | <i>Participants</i>      | 19  | Flow of participants, using a diagram                                                                                                                  | Figure 1                          |
| 36 |                          | 20  | Baseline demographic and clinical characteristics of participants                                                                                      | 6                                 |
| 37 |                          | 21a | Distribution of severity of disease in those with the target condition                                                                                 | 7-8                               |
| 38 |                          | 21b | Distribution of alternative diagnoses in those without the target condition                                                                            | N/A                               |
| 39 |                          | 22  | Time interval and any clinical interventions between index test and reference standard                                                                 | 5                                 |
| 40 | <i>Test results</i>      | 23  | Cross tabulation of the index test results (or their distribution) by the results of the reference standard                                            | Table 1 and 3                     |
| 41 |                          | 24  | Estimates of diagnostic accuracy and their precision (such as 95% confidence intervals)                                                                | 6-7 and Tables 1 and 3            |
| 42 |                          | 25  | Any adverse events from performing the index test or the reference standard                                                                            | 9                                 |
| 43 |                          |     |                                                                                                                                                        |                                   |
| 44 | <b>DISCUSSION</b>        |     |                                                                                                                                                        |                                   |
| 45 |                          | 26  | Study limitations, including sources of potential bias, statistical uncertainty, and generalisability                                                  | 12                                |
| 46 |                          | 27  | Implications for practice, including the intended use and clinical role of the index test                                                              | 11-12                             |
| 47 |                          |     |                                                                                                                                                        |                                   |
| 48 | <b>OTHER INFORMATION</b> |     |                                                                                                                                                        |                                   |
| 49 |                          | 28  | Registration number and name of registry                                                                                                               | N/A                               |
| 50 |                          | 29  | Where the full study protocol can be accessed                                                                                                          | N/A                               |
| 51 |                          | 30  | Sources of funding and other support; role of funders                                                                                                  | 1                                 |



1  
2  
3  
4  
5  
6  
7  
8  
9  
10  
11  
12  
13  
14  
15  
16  
17  
18  
19  
20  
21  
22  
23  
24  
25  
26  
27  
28  
29  
30  
31  
32  
33  
34  
35  
36  
37  
38  
39  
40  
41  
42  
43  
44  
45  
46  
47  
48  
49  
50  
51  
52  
53  
54  
55  
56  
57  
58  
59  
60

For peer review only

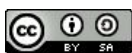

# BMJ Open

## The Vision Screening Assessment (VISA) tool - diagnostic accuracy validation of a novel screening tool in detecting visual impairment among stroke survivors.

|                                 |                                                                                                                                                                                                                                                                                                                                                                                                                                                                                                                                                                                            |
|---------------------------------|--------------------------------------------------------------------------------------------------------------------------------------------------------------------------------------------------------------------------------------------------------------------------------------------------------------------------------------------------------------------------------------------------------------------------------------------------------------------------------------------------------------------------------------------------------------------------------------------|
| Journal:                        | <i>BMJ Open</i>                                                                                                                                                                                                                                                                                                                                                                                                                                                                                                                                                                            |
| Manuscript ID                   | bmjopen-2019-033639.R1                                                                                                                                                                                                                                                                                                                                                                                                                                                                                                                                                                     |
| Article Type:                   | Original research                                                                                                                                                                                                                                                                                                                                                                                                                                                                                                                                                                          |
| Date Submitted by the Author:   | 12-Dec-2019                                                                                                                                                                                                                                                                                                                                                                                                                                                                                                                                                                                |
| Complete List of Authors:       | Rowe, Fiona; University of Liverpool, Health Services Research<br>Hepworth, Lauren; University of Liverpool, Health Services Research<br>Howard, Claire; University of Liverpool, Health Services Research<br>Bruce, Alison; Bradford Institute for Health Research, ; University of York, Health Sciences<br>Smerdon, Victoria; Arrowe Park Hospital, Orthoptics<br>Payne, Terry; University of Liverpool, Computer Science<br>Jimmieson, Phil; University of Liverpool, Computer Science<br>Burnside, Girvan; University of Liverpool Faculty of Health and Life Sciences, Biostatistics |
| <b>Primary Subject Heading</b>: | Cardiovascular medicine                                                                                                                                                                                                                                                                                                                                                                                                                                                                                                                                                                    |
| Secondary Subject Heading:      | Ophthalmology                                                                                                                                                                                                                                                                                                                                                                                                                                                                                                                                                                              |
| Keywords:                       | VISA, Screening, STROKE MEDICINE, Visual impairment, Orthoptics, Detection                                                                                                                                                                                                                                                                                                                                                                                                                                                                                                                 |
|                                 |                                                                                                                                                                                                                                                                                                                                                                                                                                                                                                                                                                                            |

SCHOLARONE™  
Manuscripts



I, the Submitting Author has the right to grant and does grant on behalf of all authors of the Work (as defined in the below author licence), an exclusive licence and/or a non-exclusive licence for contributions from authors who are: i) UK Crown employees; ii) where BMJ has agreed a CC-BY licence shall apply, and/or iii) in accordance with the terms applicable for US Federal Government officers or employees acting as part of their official duties; on a worldwide, perpetual, irrevocable, royalty-free basis to BMJ Publishing Group Ltd ("BMJ") its licensees and where the relevant Journal is co-owned by BMJ to the co-owners of the Journal, to publish the Work in this journal and any other BMJ products and to exploit all rights, as set out in our [licence](#).

The Submitting Author accepts and understands that any supply made under these terms is made by BMJ to the Submitting Author unless you are acting as an employee on behalf of your employer or a postgraduate student of an affiliated institution which is paying any applicable article publishing charge ("APC") for Open Access articles. Where the Submitting Author wishes to make the Work available on an Open Access basis (and intends to pay the relevant APC), the terms of reuse of such Open Access shall be governed by a Creative Commons licence – details of these licences and which [Creative Commons](#) licence will apply to this Work are set out in our licence referred to above.

Other than as permitted in any relevant BMJ Author's Self Archiving Policies, I confirm this Work has not been accepted for publication elsewhere, is not being considered for publication elsewhere and does not duplicate material already published. I confirm all authors consent to publication of this Work and authorise the granting of this licence.

1  
2  
3 **The Vision Screening Assessment (VISA) tool - diagnostic accuracy validation of a novel**  
4 **screening tool in detecting visual impairment among stroke survivors.**  
5  
6

7  
8 Fiona J Rowe<sup>1,2,3</sup>, Lauren R Hepworth<sup>1,3,4</sup>, Claire Howard<sup>1,3</sup>, Alison Bruce<sup>4</sup>, Victoria Smerdon<sup>5</sup>,  
9 Terry Payne<sup>6</sup>, Phil Jimmieson<sup>6</sup>, Girvan Burnside<sup>7</sup>  
10  
11

12  
13 1, Department of Health Services Research, University of Liverpool, UK

14 2, Department of Ophthalmology, Walton Centre for Neurology and Neurosurgery,  
15  
16 Liverpool, UK

17  
18 3, Department of Orthoptics, Salford Royal NHS Foundation Trust, Salford, UK

19 4, Bradford Institute for Health Research, Bradford Teaching Hospitals NHS Foundation  
20  
21 Trust, Bradford, UK

22  
23 5, Department of Orthoptics, Wirral University Teaching Hospital NHS Foundation Trust,  
24  
25 Liverpool, UK

26  
27 6, Department of Computer Science, University of Liverpool, UK

28  
29 7, Department of Biostatistics, University of Liverpool, UK  
30  
31

32  
33 **Address for correspondence:**

34 Prof Fiona Rowe

35 Department of Health Services Research

36 Waterhouse Building Block B, 2<sup>nd</sup> floor,

37 University of Liverpool,

38 1-5 Brownlow Street,

39 Liverpool L69 3GL

40 E: [rowef@liverpool.ac.uk](mailto:rowef@liverpool.ac.uk)

41 T: 0151 7944956  
42  
43  
44  
45  
46  
47  
48  
49  
50

51 Disclosures: The authors report no conflict of interest for this study.

52 Funding: This study was supported by the University of Liverpool.

53 Word count: 4187

54 Cover title: Visual impairment screening assessment tool (VISA)

55  
56  
57  
58  
59 Number of figures: 1  
60

1  
2  
3 Number of tables: 4  
4

5 **Keywords:** VISA; Screening; Stroke; Visual impairment; Orthoptics; Detection  
6

7 **Author contributions:** FR provided oversight for the study and led the writing of the paper.  
8 FR, LH, CH, VS and AB contributed to data collection, reviewing the draft paper and  
9 approving the final version. TP and PJ contributed to the development of VISA app software  
10 and its testing, and reviewed the draft paper and approved the final version. GB contributed  
11 to the statistical analysis and interpretation, reviewed draft amendments and approved the  
12 final version.  
13  
14  
15  
16  
17

18 **Data access;** Data can be accessed via direct contact with the lead author.  
19  
20  
21  
22

## 23 24 **Abstract**

25 Purpose: Screening for visual problems in stroke survivors is not standardised. Visual  
26 problems that remain undetected or poorly identified can create unmet needs for stroke  
27 survivors. We report the validation of a new Vision Impairment Screening Assessment (VISA)  
28 tool intended for use by the stroke team to improve identification of visual impairment in  
29 stroke survivors.  
30  
31  
32  
33

34 Methods: We conducted a prospective case cohort comparative study in four centres to  
35 validate the VISA tool against a specialist reference vision assessment. VISA is available in  
36 print or as an app (MHRA regulatory approved); these were used equally for two groups.  
37 Both VISA and the comprehensive reference vision assessment measured case history,  
38 visual acuity, eye alignment, eye movements, visual field and visual inattention. The primary  
39 outcome measure was the presence or absence of visual impairment.  
40  
41  
42  
43  
44  
45

46 Results: Two hundred and twenty-one stroke survivors were screened. Specialist reference  
47 vision assessment was by experienced orthoptists. Full completion of screening and  
48 reference vision assessment was achieved for 201 stroke survivors. VISA print was  
49 completed for 101 stroke survivors; VISA app was completed for 100. Sensitivity and  
50 specificity of VISA print was 97.67% and 66.67% respectively. Overall agreement was  
51 substantial; K=0.648. Sensitivity and specificity of VISA app was 88.31% and 86.96%  
52 respectively. Overall agreement was substantial; K=0.690. Lowest agreement was found for  
53 screening of eye movement and near visual acuity.  
54  
55  
56  
57  
58  
59  
60

1  
2  
3 Conclusions: This validation study indicates acceptability of VISA for screening of potential  
4 visual impairment in stroke survivors. Sensitivity and specificity were high indicating the  
5 accuracy of this screening tool. VISA is available in print or as an app allowing versatile  
6 uptake across multiple stroke settings.  
7  
8  
9

### 10 11 12 ***Strengths and limitations of this study*** 13

- 14  
15 • Validation of the VISA screening tool in this prospective study shows improved  
16 detection accuracy for detection of stroke-related visual impairment  
17
- 18 • The study included clinicians involved in stroke care who are not specialists in vision  
19 problems and lack formal eye training.  
20
- 21 • Where early visual impairment detection occurs, this facilitates prompt referral with  
22 fewer false positives and negatives.  
23
- 24 • Through process evaluation, clinicians reported acceptability of the VISA screening  
25 tool for its use in screening for presence of vision problems in stroke survivors.  
26
- 27 • The VISA screening tool may further be of potential use for visual screening in other  
28 care settings such as neuro-rehabilitation.  
29  
30  
31  
32  
33

### 34 35 **Introduction** 36

37  
38 The prevalence of overall visual impairment has been estimated at 65-73% with varying  
39 prevalence reported for specific types of visual impairment (inclusive of reduced central  
40 vision, ocular motility defects, visual field loss and visual perception problems) [1-4]. Figures  
41 for the incidence of new onset visual impairment following stroke are placed at about 60%  
42 [4]. Given the estimated 100,000 new onset strokes per annum in the UK there are sizeable  
43 numbers of stroke survivors living with stroke-related visual impairment [5].  
44  
45

46  
47 Visual impairment constitutes a considerable comorbidity of stroke. Visual impairment, on  
48 its own or in addition to other stroke-related disabilities, can cause significant impact to  
49 quality of life [6]. For many, it results in inability or altered ability to undertake many aspects  
50 of daily activities with impact on return to work, participation in hobbies and family life, and  
51 can lead to social isolation, altered mood and depression [7-9]. Interventions for stroke-  
52 related visual impairment are well established [10] but require referral to appropriate eye  
53 care services, which is facilitated through orthoptic service routes [11]. Where visual  
54  
55  
56  
57  
58  
59  
60

1  
2  
3 impairment is identified, this facilitates optimisation of other therapy and early access to  
4 vision rehabilitation.  
5

6  
7 There are issues with how best to identify the presence of visual impairment through stroke  
8 team vision screening and specialist vision assessment [12]. Even with screening measures  
9 in place there are also issues reported with provision of care and access to vision services  
10 for stroke survivors who have been identified as having vision problems [13].  
11

12  
13 The overall aim of this study was to validate the Vision Impairment Screening Assessment  
14 (VISA) tool which uses simple established assessments of visual function coupled with  
15 detailed instructions. Our objectives were to test VISA, available in print or as a software  
16 application, against a reference of a specialist vision assessment to determine sensitivity,  
17 specificity, predictive values and inter-rater agreement of results between VISA and  
18 specialist vision assessments.  
19  
20  
21  
22  
23  
24  
25

## 26 27 **Methods**

28  
29 The development and pilot validation of VISA have been described elsewhere [14]. This  
30 study is reported in accordance with the STARD guidelines [15].  
31

## 32 33 **Design**

34  
35 A prospective case cohort comparative design was used for the validation clinical study  
36 between September 2016 and February 2019. Individuals were suitable for inclusion if they  
37 were 18 years of age or older, had clinical diagnosis of stroke as defined by World Health  
38 Organisation, had the ability to agree to vision screening using verbal or non-verbal  
39 indications of agreement, did not have severe cognitive impairment preventing screening  
40 defined as difficulty with memory/concentration/decision making and thus being unable to  
41 follow instructions, and did not decline vision screening. This was a convenience sample of  
42 participants who were identified as being eligible from inpatients on the acute stroke unit.  
43  
44 With recruitment on the acute stroke unit, time to VISA assessment was typically within one  
45 week of stroke onset. Our inclusion criteria were intended to be pragmatic and inclusive of  
46 as many stroke survivors as possible. The clinical study was undertaken in accordance with  
47 the Tenets of Helsinki with NHS research ethical approval. Research ethics approval was  
48 obtained separately for VISA print (16/NI/0125) and for VISA app (17/WA/0411). All  
49 participants provided informed consent.  
50  
51  
52  
53  
54  
55  
56  
57  
58  
59

## 60 **Setting, Recruitment and Assessment**

1  
2  
3 Recruitment took place across five hospitals (secondary hospital care) in which an orthoptist  
4 was a member of the core acute stroke unit multidisciplinary team (as per national  
5 guidelines: Royal College of Physicians Intercollegiate Stroke Guidelines and British & Irish  
6  
7 Orthoptic Society extended guidelines for stroke practice) [16, 17].  
8  
9

10 For the purpose of this study, vision screening was undertaken with VISA and screening was  
11 defined as the assessment of stroke survivors for the presence of reduced visual function  
12 against pre-set abnormality criteria, outlined in the statistical methodology section.  
13  
14

15 Specialist visual assessment was defined as the vision assessment undertaken by an  
16 orthoptist in which detection of visual impairment was coupled with formal diagnosis of the  
17 type of visual condition present. As a minimum this consisted of near and distance LogMAR  
18 visual acuity, cover test, ocular motility assessment, standardised visual field to  
19 confrontation using 10mm red targets and visual inattention assessment.  
20  
21  
22  
23

24 Each stroke survivor underwent two vision assessments: the routine orthoptic specialist  
25 vision assessment and the VISA screening assessment. Patients were recruited consecutively  
26 as being identified to meet the inclusion criteria and providing consent to participate.  
27  
28  
29

30 VISA was available in print and as a software app. The app was approved by the Medicines  
31 and Healthcare products Regulatory Authority (MHRA: Reference CI/2017/0065) for NHS  
32 use in this study. VISA was used in print form for the first half of recruitment and,  
33 subsequently in app form for the second half of recruitment to this study. Both VISA formats  
34 consisted of five VISA sections comprising case history, LogMAR visual acuity at near and  
35 distance, eye alignment and movement, visual fields and visual inattention. A separate  
36 section comprising stand-alone user instructions is included. In brief, VISA consists of five  
37 sections. Section 1 comprises a case history with questions and observations of visual  
38 symptoms and signs. When it is not possible to obtain a case history from the patient, the  
39 tool advises to consult family members/carers. The person completing the screen is  
40 instructed to observe for abnormalities of lids, pupils and head position among other vision  
41 signs. Section 2 comprises an assessment of LogMAR visual acuity for near (35cm) and  
42 distance (3 metres); monocular or binocular depending on the ability of the patient. A  
43 matching card was available for patients who were unable to name letters but could point  
44 to letters. For those unable to comply with any letter test, a further option included grating  
45 cards that utilise a preferential looking technique which is particularly useful with  
46 cognitive/communication issues. Section 3 is an assessment of eye alignment observing  
47  
48  
49  
50  
51  
52  
53  
54  
55  
56  
57  
58  
59  
60



1  
2  
3 symmetry of the corneal reflections of each eye. Clinician observations can be compared to  
4 images of straight eyes or images of eyes in converged, diverged, elevated or depressed  
5 strabismus positions. Eye movements (smooth pursuits) assessed full movements of each  
6 eye into up, down, right and left gaze positions. Clinician observations could be compared to  
7 images of full ocular rotations to right/left gaze, elevation/depression and on convergence.  
8 Section 4 is an assessment of visual field, and section 5 is an assessment of visual inattention  
9 including line bisection, clock drawing and a cancellation task. The print and app versions  
10 are identical with the exception of the visual field assessment. In VISA print, a standardised  
11 method of confrontation is conducted. Confrontation follows a typical method with the  
12 clinician seated directly opposite the patient at a distance of 1metre and following stages  
13 that involve the patient indicating when a 10mm red target is seen in the periphery of their  
14 vision, finger counting in each quadrant of the visual field and comparison of examiner facial  
15 features. In VISA app, a kinetic visual field assessment is undertaken which, at a test  
16 distance of 30cms and a screen width of 24.6cms, allows an assessment of the 40 degree  
17 visual field. The patient is asked to fixate a static fixation point in the corner of the screen  
18 whilst a stimulus moves from the other edges. They are asked to tap the tablet screen when  
19 the stimulus is seen. This is repeated with the fixation target positioned at all four corners of  
20 the screen.  
21  
22  
23  
24  
25  
26  
27  
28  
29  
30  
31  
32  
33  
34  
35

36 Section 5 includes three routine assessments for visual inattention; line bisection, clock  
37 drawing and a cancellation task. The line bisection task requires the patient to indicate the  
38 centre of line for three lines of differing lengths. The cancellation task requires the patient  
39 to cross out large clock symbols amongst distractors of small clock symbols and large/small  
40 open circles. Clock drawing requires the patient to draw the numbers and clock hands on a  
41 blank circle. VISA app collates data from each of the sections to create a pdf record of the  
42 assessment. The free-to-access VISA tool is available on; [www.vision-research.co.uk](http://www.vision-research.co.uk) (*this  
43 link will go live on publication of this paper*).  
44  
45  
46  
47  
48  
49

50 The routine orthoptic vision assessment comprised detailed diagnostic assessments of case  
51 history, visual acuity, ocular alignment and movement, visual field and visual perception.  
52 This assessment was undertaken within 24 hours (typically the same day) of the VISA screen  
53 – to minimise effect of potential recovery. The orthoptic assessment covered all assessment  
54 sections included in the VISA tool. However the orthoptist undertook a detailed assessment  
55  
56  
57  
58  
59  
60

1  
2  
3 using their specialist expertise to interpret the results and adapt testing methods to  
4 individual requirements.  
5

6  
7 The order of the VISA screening and orthoptic vision assessments varied in a pragmatic  
8 manner to avoid the effects of fatigue and bias towards either the screen or orthoptic vision  
9 assessment. The screener and orthoptist were blinded to each other's assessments to  
10 prevent bias of assessment. The within-assessment order of testing varied for the orthoptic  
11 assessment. However, the order of testing within the VISA screen followed a set order of 1)  
12 case history, 2) visual acuity, 3) eye alignment and movement, 4) visual field and 5) visual  
13 inattention assessments.  
14  
15  
16  
17  
18

### 19 ***Statistical methodology and sample size***

20  
21 Results were taken in numerical format from the referral forms completed by both the  
22 screener and orthoptist. The orthoptic vision assessment was taken as the reference  
23 standard.  
24  
25

26  
27 The primary outcome measure was a binary measure of the presence or absence of visual  
28 impairment (defined as one or more of the following; reduced distance vision  $<0.2$ , reduced  
29 near vision  $<0.3$  (equivalent to N6), deviated eye position, eye movement abnormality  
30 (incomplete eye rotations in any position of gaze), visual field loss (e.g. presence of  
31 hemianopia, quadrantanopia, constriction), visual inattention with displaced line bisection,  
32  $<42$  score on cancellation task and/or incomplete/displaced clock drawing). The primary  
33 outcome measure was evaluated by Kappa values assessing chance-eliminated agreement  
34 between the results of the VISA screening and orthoptic vision assessment.  
35  
36  
37  
38  
39  
40

41  
42 Secondary outcome measures were the calculation of sensitivity, specificity and predictive  
43 values. Level of sensitivity was estimated as the proportion of patients with visual  
44 impairment as diagnosed by the gold standard clinical examination, that are correctly  
45 identified by the screener, and the corresponding 95% confidence interval was calculated.  
46  
47 Level of specificity was estimated as the proportion of patients without visual impairment  
48 that are correctly identified by the screener, and the corresponding 95% confidence  
49 interval. Further, we calculated the positive and negative predictive values for the VISA  
50 screen. Kappa (K) values assessed chance-eliminated agreement between the individual  
51 components of VISA tool and orthoptic vision assessment. The interpretation used was 0.0-  
52 0.2 poor, 0.21-0.4 fair, 0.41-0.6 moderate, 0.61-0.8 substantial and 0.81-1.0 almost perfect  
53 [18]. Analysis was conducted using StatsDirect software (StatsDirect Ltd).  
54  
55  
56  
57  
58  
59  
60

1  
2  
3 For sample size, we applied the principles for diagnostic accuracy studies, and aimed to  
4 recruit a sample of 100 for validation of VISA print and a further sample of 100 for VISA app  
5 [19].  
6  
7

### 8 ***Process evaluation***

9  
10 Process evaluation for acceptability of VISA during the clinical study was collected via  
11 clinician feedback sheets and one-to-one reports from patients. Feedback sheets could be  
12 returned at any time during the study to report any issues with testing alongside obtaining  
13 clinician views based on their use of VISA. Feedback sheets asked the following:  
14  
15  
16

- 17 1. Are the instructions for the various tests clear?
- 18 2. Which instructions should be amended?
- 19 3. What additional instruction information/rewording do you suggest?
- 20 4. Which instructions require less information?
- 21 5. Are any tests not useful or difficulty to do? (Specify)
- 22 6. Should any other tests be added in?
- 23 7. How long does it take you to do the screen?
- 24 8. Other comments?

25  
26  
27  
28  
29  
30  
31  
32 Comments collected from feedback sheets and reports were collated descriptively.

### 33 ***Patient and Public Involvement***

34  
35  
36  
37 Patients were involved in the design and monitoring of this study. Patients from the VISable  
38 stroke and vision panel were consulted when devising the study plan and conduct. Reports  
39 during the conduct of this study were circulated to the VISable panel for patient monitoring  
40 purposes.  
41  
42  
43  
44

## 45 **Results**

### 46 ***Completion rate***

47  
48 Two hundred and twenty-one stroke patients received both a VISA screening assessment  
49 and a reference vision assessment (during the period of September 2016 to February 2019).  
50 All elements of the VISA screen were attempted by 201 patients. VISA print was used with  
51 121 patients from which complete data was available for 101 for analysis. The mean age of  
52 patients on stroke admission was 70.6 (SD 13.5), 46 were female and 54 male. The reported  
53 mean time of test duration was 23.5 minutes (SD 10.0).  
54  
55  
56  
57  
58  
59  
60

VISA app was completed with 100 patients was a mean age of 63.4 (SD 13.4), of which 72 were male and 28 were female.

VISA print was fully completed by 91 patients, with the remaining 10 missing one or more elements (near vision n=5, distance vision n=5, ocular motility n=1, visual fields n=1, visual inattention n=9). The orthoptic vision assessment was fully completed by 90 patients, with the remaining 11 missing one or more elements (near vision n=8, visual inattention n=9). Reasons for inability to complete one or more of the elements were typically recorded as either cognitive impairment or fatigue. VISA app and orthoptic vision assessment were fully completed by all 100 patients. Missing data did not automatically result in failure for that section, thereby requiring referral. The reason for failure was taken into account; for example if a section was not completed due to fatigue this would not pragmatically have resulted in a referral but instead, a retest.

#### ***Referral agreement for VISA print***

The agreement of whether to make a referral to specialist eye services based on the results of the VISA print versus those from orthoptic vision assessment had a Kappa value of 0.648 (substantial agreement) (95% CI 0.424 – 0.872).

Sensitivity of 97.67% and specificity of 60.00% were found. The positive and negative predictive values were 93.33% and 81.82% respectively. These calculations are outlined in Table 1. Agreement was found for 93 participants (nine had no visual impairment, 84 required referral because of failed screening) as outlined in Figure 1.

**Table 1:** Calculations of sensitivity, specificity and predictive values for VISA print

|                                                                 |    |
|-----------------------------------------------------------------|----|
| <i>Positive i.e. pathologic n=86</i>                            |    |
| True positive, i.e. visual impairment present and referred      | 84 |
| False negative, i.e. visual impairment present but not referred | 2  |
| <i>Negative i.e. normal n=15</i>                                |    |
| False positive, i.e. visual impairment not present but referred | 6  |
| True negative, i.e. visual impairment not present and not       | 9  |
| Output                                                          |    |

|                                                                          |                                    |
|--------------------------------------------------------------------------|------------------------------------|
| Sensitivity (true positive/true positive + false negative)               | 97.67%<br>(95% CI: 91.85 – 99.72%) |
| Specificity (true negative/false positive + true negative)               | 60.00%<br>(95% CI: 32.29 – 83.66%) |
| Positive predictive value (true positive/false positive + true positive) | 93.33%<br>(95% CI: 88.27 – 96.30%) |
| Negative predictive value (true negative/false negative + true negative) | 81.82%<br>(95% CI: 51.83 – 94.95%) |

VISA print produced two false negative and six false positive results. Of the false negative results, both had ocular motility problems, of which one also had reduced near vision. The two ocular motility problems missed were asymptomatic minimal rotary nystagmus and limited elevation. The latter also had reduced near vision at 0.450 LogMAR. For false positive results, three with reduced near vision, two with ocular motility problems and one with both reduced near vision and visual inattention, were detected by screening and found not to be present by the orthoptic vision assessment. The referral relating to reduced near vision all detected N8 level of vision in one or both eyes. The referral relating to visual inattention were detected on the clock drawing element; it was noted by the examiner that the inaccurate completion was likely due to cognitive impairment. The ocular motility problems detected were reported as limitation of vertical gaze and nystagmus.

#### ***Test component agreement for VISA print***

The agreements for the individual components between VISA print and orthoptic vision assessments are outlined in Table 2. The highest levels of agreement were produced for distance visual acuity (0.565) and visual fields (0.504), both with moderate agreement. The lowest level of agreement was produced for near visual acuity (0.236) and ocular motility (0.367), both with fair agreement. Low agreement for ocular motility related to high false positives and false negatives. In ten cases (one with multiple conditions) were not detected (false negative). These comprised of four defects of vertical movement (including one upgaze palsy, two restrictions of elevation and one V-pattern), three cases of nystagmus (including one minimal rotary nystagmus, one gaze-evoked and one end-point nystagmus), and four cases of reduced convergence. The low agreement with near visual acuity related to high false negatives where 23 cases were not detected – these comprised of ten with 0.4 LogMAR or better, nine between 0.4 and 0.5 LogMAR and three 0.6 LogMAR or worse.

**Table 2:** Summary of agreement between VISA print and orthoptic vision assessment for referral to specialist eye services and individual components

| Element of testing     | Agreement | False negative | False positive | Kappa value (95% CI)  |
|------------------------|-----------|----------------|----------------|-----------------------|
| Referral               | 93        | 2              | 6              | 0.648 (0.424 – 0.872) |
| Near visual acuity     | 65        | 23             | 12             | 0.236 (0.045 – 0.427) |
| Distance visual acuity | 79        | 9              | 13             | 0.565 (0.405 – 0.725) |
| Ocular alignment       | 89        | 5              | 7              | 0.388 (0.110 – 0.667) |
| Ocular motility        | 72        | 10             | 19             | 0.367 (0.181 – 0.553) |
| Visual fields          | 76        | 7              | 18             | 0.504 (0.339 – 0.668) |
| Visual inattention     | 74        | 4              | 21             | 0.500 (0.340 – 0.659) |

### **Referral agreement for VISA app**

The agreement of whether to make a referral to specialist eye services based on the results of VISA app versus those from orthoptic vision assessment had a Kappa value of 0.690 (substantial agreement) (95% CI 0.528-0.851).

Sensitivity of 88.31% and specificity of 86.96% were calculated. The positive and negative predictive values were 95.77% and 68.97% respectively. These calculations are outlined in Table 3.

**Table 3:** Calculations of sensitivity, specificity and predictive values for VISA app

|                                                                 |                                    |
|-----------------------------------------------------------------|------------------------------------|
| <i>Positive i.e. pathologic n=77</i>                            |                                    |
| True positive, i.e. visual impairment present and referred      | 68                                 |
| False negative, i.e. visual impairment present but not referred | 9                                  |
| <i>Negative i.e. normal n=23</i>                                |                                    |
| False positive, i.e. visual impairment not present but referred | 3                                  |
| True negative, i.e. visual impairment not present and not       | 20                                 |
| Output                                                          |                                    |
| Sensitivity (true positive/true positive + false negative)      | 88.31%<br>(95% CI: 78.97 – 94.51%) |

|                                                                          |                                    |
|--------------------------------------------------------------------------|------------------------------------|
| Specificity (true negative/false positive + true negative)               | 86.96%<br>(95%CI: 66.41 – 97.22%)  |
| Positive predictive value (true positive/false positive + true positive) | 95.77%<br>(95% CI: 88.72 – 98.49%) |
| Negative predictive value (true negative/false negative + true negative) | 68.97%<br>(95% CI: 54.10 – 80.73%) |

Agreement was found for 88 participants (20 had no visual impairment, 68 required referral because of failed screening) as outlined in Figure 1. VISA app produced nine false negative and three false positive results. Of the false negative results, four had slightly reduced near vision between 0.3 and 0.4 LogMAR, two had reduced distance vision of 0.3 LogMAR, two had mild visual inattention (one detected on clock cancellation and was the examiners judgement) and one had reduced near vision of 0.4 LogMAR and a visual field defect (partial right superior quadrantanopia detect on confrontation only, but not detected by formal perimetry using binocular Esterman). False positive results (one with reduced distance vision, one with a visual field defect and one with both a visual field defect and visual inattention) were detected by screening and found not to be present by the orthoptic vision assessment. The referral relating to reduce distance vision was 0.4 LogMAR. The referral relating to a visual field defect of general constriction and the visual inattention was detected on the longest line in the line bisection element. The other visual field defect detected was general constriction.

#### ***Test component agreement for VISA app***

The agreements for the individual components between VISA app and orthoptic vision assessments are outlined in Table 4. The highest levels of agreement were produced for distance visual acuity (0.783) and visual fields (0.701), both with substantial agreement. The lowest level of agreement was produced for visual inattention (0.323) with fair agreement. The low agreement with visual inattention related to 16 false positives, of which 13 were detected with one of the three tests, 12 with line-bisection, 1 with clock drawing.

**Table 4:** Summary of agreement between VISA app and orthoptic vision assessment for referral to specialist eye services and individual components.

| Element of testing     | Agreement | False negative | False positive | Kappa value (95% CI)  |
|------------------------|-----------|----------------|----------------|-----------------------|
| Referral               | 88        | 9              | 3              | 0.690 (0.528 – 0.851) |
| Near visual acuity     | 77        | 19             | 3              | 0.416 (0.227 – 0.605) |
| Distance visual acuity | 90        | 6              | 4              | 0.783 (0.656 – 0.910) |
| Visual fields          | 85        | 3              | 12             | 0.701 (0.564 – 0.838) |
| Visual inattention     | 78        | 6              | 16             | 0.323 (0.108 – 0.538) |

### ***Perimetry agreement***

Twenty-five participants had formal perimetry using the binocular Esterman programme rather than confrontation. There was perfect agreement (1.0) of whether a visual field defect was present between the kinetic visual field test on VISA app versus formal perimetry using the binocular Esterman programme. Twenty-one had a visual field defect and four were found to have a normal visual field.

### ***Process evaluation***

Information from feedback sheets and detailed notes from interviews were compiled and grouped for type of feedback. Minimal feedback was obtained during the validation study. Feedback related to the duration of screening, presentation of tests on the app and referral guides. One stroke unit noted that VISA could take too long in the hyper-acute stage with unwell patients. Feedback on app presentation included a change to the clock drawing circle (to remove lines that might indicate time markers), change to the fixation target for the visual field test, additional of a nystagmus check on eye movement testing (in addition to its presence in the case history checklist) and ability to delete erroneous marks on the line bisection test. For referral guidance, feedback requested the addition of a refer / retest icon on the patient results page. Further feedback reported greater ease of screening with the app for those having to use their non-dominant hand because of upper limb motor impairment. Stroke survivors found it easier to respond using the touch screen than traditional pen and paper tasks when using their non-dominant hand.



## Discussion

In this study, we present the VISA screening tool, performed by non-eye trained specialists, with validation results for the printed version and for the software app. Overall, referral had sensitivity and specificity of >88% and >60% respectively, positive and negative predictive values of >93% and >68% respectively, with substantial agreement between VISA screening and comprehensive orthoptic assessment of about Kappa 0.7. Agreement was lowest for eye movement screening, near visual acuity and visual inattention whereas all other individual sections showed higher levels of agreement. Process evaluation aided further refinement of VISA and, in particular, changes to presentation features on the app version.

When designing and using screening tools there is a balance between sensitivity and specificity for reliable detection of deficits. Low agreement in the VISA sections related to high false positive referrals where VISA screen indicated a fail for ocular motility or visual inattention. The orthoptic vision assessment confirmed ocular motility changes which were classed as 'normal' physiological eye movement patterns such age-related reduced elevation, and which alone would not have required referral. False positive referrals for visual inattention occurred where the patient failed to complete the section because of fatigue or cognitive impairment. Reduced visual acuity was always at a borderline level just above the fail threshold.

False negative referrals are important to consider; failed detection of significant deficits is to be avoided. Our results showed low numbers of false negatives which included failed detection of ocular motility defects, reduced visual acuity, visual inattention and visual field defect. The ocular motility defects were related to asymptomatic limited elevation and minimal nystagmus which would not have constituted referrals by orthoptic vision assessment. Reduced visual acuity, similar to the false positive results, was always close to the pass/fail threshold. Arguably, this is an ideal call for retest rather than refer. One case of mild visual inattention was not passed by VISA app where the diagnosis had been made by clinical observation. One visual field defect related to a peripheral field loss; a defect that could not be detected by the central testing area of VISA app.

Specificity was higher when using VISA app compared to VISA print. Mean age for the VISA app group was lower than the VISA print group with more male than female participants in the VISA app group. It is unlikely that age/sex differences affected agreement between the VISA print/app formats versus orthoptic assessment as all participants, by default of

1  
2  
3 meeting the inclusion criteria, were able to undergo both assessments. Differences are  
4 more likely due to the staff mix using VISA. VISA print was used solely by members of the  
5 stroke team and often without any formal vision training. VISA app was used by a mix of  
6 stroke team members but also orthoptists. Accuracy was likely enhanced by involvement of  
7 the latter. Referral agreements overall for decision on making a referral were 0.648 (VISA  
8 print) and 0.690 (VISA app), both indicating substantial agreement. It should be noted that  
9 Kappa is dependent on the base rate of the outcome being assessed, with calculated values  
10 being lower when the prevalence of the outcome is either very high or very low. Bruckner  
11 and Yoder suggest estimating overall accuracy using a combination of Kappa and base rate  
12 of outcome [20]. This method does not change the conclusions drawn here, as these  
13 outcomes with substantial agreement have estimated accuracy of at least 90% when base  
14 rate is taken into account, and those with moderate agreement at least 85% estimated  
15 accuracy.

16  
17 VISA print and app provide a vision screen across the main categories of potential visual  
18 impairment following stroke. Besides a case history section, screening includes visual acuity,  
19 eye position and movements, visual fields and visual inattention. There are potential  
20 advantages for using either the manual tool or the app. Some clinicians and stroke survivors  
21 may prefer and respond better to use of traditional testing options inclusive of pen and  
22 paper tasks. The recording charts are completed during the testing period and can be  
23 entered in hospital case notes immediately. The app produces a PDF file of results which has  
24 to be printed before entry in hospital case notes. Conversely, the PDF file is an advantage  
25 for electronic hospital records. Further, the app provides a constant background  
26 illumination for screening assessments whereas the manual is used under variable lighting  
27 conditions dependent on wherever the screening is undertaken. The app uses a kinetic  
28 central visual field assessment that is run as a standardised test which reduces examiner  
29 bias – a bias that persists for confrontation visual field assessment.

30  
31 When developing and validating a screening tool it is important that it is compared to a gold  
32 standard. In our UK services the gold standard is an orthoptic assessment undertaken on the  
33 acute stroke unit. The development and pilot of VISA followed a robust process [14]. In this  
34 follow-on validation study we considered the results of VISA versus the gold standard  
35 orthoptic assessment in evaluating construct and content validity. We further considered  
36 ecological validity through use of the tool by clinical (not research) stroke teams in the real-  
37  
38  
39  
40  
41  
42  
43  
44  
45  
46  
47  
48  
49  
50  
51  
52  
53  
54  
55  
56  
57  
58  
59  
60

1  
2  
3 world environment of busy acute stroke units in the UK National Health Service.  
4 Additionally, we sought specific feedback through process evaluation collecting feedback  
5 forms from stroke team clinicians and patient reports.  
6  
7

8  
9 A systematic review of screening options for post-stroke visual impairment reported vision  
10 screening checklists and stroke screening tools (e.g. National Institute for Health Stroke  
11 Scale, FAST-AVVV, ABCD-E2) which include elements of vision assessment, however not all  
12 potential visual impairments are screened [21]. Past vision screening publications have  
13 reported the results of vision 'checklists' – lists of information gathered from questioning  
14 the patient, observations or from data documented in the case notes. The Vision In Stroke  
15 (VIS) reported checklist screening in 915 stroke survivors with sensitivity of 0.42, specificity  
16 of 0.52 and agreement against a reference standard of 0.428 (-0.048 to 0.019 CI: Kappa) [2,  
17 12]. An Australian study reported the use of a checklist for detection of eye conditions and  
18 vision defects in 100 stroke survivors with 69% accuracy and intra-class correlation of 0.84  
19 (0.77-0.89 CI) [22]. More recently, a vision screening app (available on android platforms)  
20 was developed for use with stroke survivors (StrokeVision app) with sections assessing  
21 visual acuity, visual fields and visual inattention [23]. This was validated with a cohort of 45  
22 stroke survivors with sensitivities across the various sections of 50-79% and specificities of  
23 87-98%. The specificities reported are higher than those from our VISA study but likely  
24 reflect the use of the StrokeVision app by fully trained research assistants versus the VISA  
25 completion by members of the stroke multidisciplinary team who only followed the in-built  
26 screening instructions.  
27  
28  
29  
30  
31  
32  
33  
34  
35  
36  
37  
38  
39  
40

41 Overall, vision tools/apps provide a more extensive screening of vision with greater accuracy  
42 than vision checklists. However, there are issues with how best to identify the presence of  
43 visual impairment through stroke team vision screening and specialist vision assessment  
44 [21, 24]. Even with screening measures in place there are also issues reported with provision  
45 of care and access to vision services for stroke survivors who have been identified as having  
46 vision problems [13].  
47  
48  
49  
50  
51

52 An ideal stroke vision service follows recommendations from the National Clinical Guidelines  
53 for Stroke which specify orthoptists as core members of the acute stroke team and screen  
54 all stroke survivors prior to discharge [16]. Despite consistent findings that inclusion of  
55 vision services within the multi-disciplinary team (MDT) is highly beneficial, such visual  
56 assessment is not common and services are inconsistent throughout the UK. Stepped  
57  
58  
59  
60

1  
2  
3 models of care must be considered to meet the needs of stroke survivors against the  
4 context of local service capacity. Access to orthoptic services on acute stroke units enables  
5 faster provision of vision screening. The earlier assessment time-point reported for the IVIS  
6 study is important as it shows the feasibility and acceptability of early visual assessment  
7 within 3 days of stroke onset for at least half of stroke survivors and within 1 week of stroke  
8 onset for the majority [4]. Early detection of visual impairment is important. Although some  
9 cases of visual impairment will recover quickly, the majority do not. Moreover, there are  
10 few predictive factors for who will recover [4]. This prompt early detection, in turn, allows  
11 early detection of visual impairment and sharing of the functional significance of this with  
12 the patients, carers and stroke teams. Furthermore, early assessment leads to early  
13 intervention which has potential impact on general rehabilitation where visual function can  
14 be improved [2, 3, 10]. In the absence of orthoptic services, further stepped down models of  
15 care include the use of screening tools or screening checklists.

16  
17  
18 Such screening methods cannot replace the accuracy of a reference, specialist vision  
19 assessment. However, they serve an important purpose of obtaining a standardised screen  
20 in the absence of on-site specialist vision services and are better than no or non-  
21 standardised assessments by non-eye trained clinicians. In such instances, we advise the use  
22 of a screening tool. The advantages of VISA print and app are their validation in a real-world  
23 pragmatic study conducted in acute stroke units and used by non-eye trained clinicians.  
24 Clinicians used the in-built standalone instructions – designed to avoid the need of regular  
25 specialist vision training which can be difficult to access or provide. Further, the app is  
26 MHRA approved for clinical assessment; an important requirement for NHS adoption. The  
27 availability of VISA as a manual and as an app facilitates use alongside paper-based records  
28 or integration with electronic patient record systems.

29  
30  
31 Vision checklists have been shown to have a low sensitivity and specificity, and an over-  
32 reliance on the report of visual symptoms [2, 12]. The VISA print and app offer an  
33 intermediate measure between vision checklists and orthoptic specialist vision services with  
34 greater accuracy than vision checklists but lacking the accuracy of orthoptic assessments  
35 and the immediate access to management of visual problems provided by orthoptic stroke  
36 unit services. The VISA print/app does not preclude the use of vision checklists however, for  
37 some stroke survivors who are very unwell acutely and/or lack sufficient cognition and  
38  
39  
40  
41  
42  
43  
44  
45  
46  
47  
48  
49  
50  
51  
52  
53  
54  
55  
56  
57  
58  
59  
60

1  
2  
3 communication, simpler vision checklists are quick and easy to use in such circumstances  
4 and remain more accurate than no vision screen at all.  
5  
6

7  
8 There are some limitations to consider for this study. The VISA screening tool was used on  
9 acute stroke units. There was no validation of the tool in community settings. However,  
10 there is little reason to think it would be of less or use or accuracy when used in other stroke  
11 settings. Test-retest and inter-rater variability of the VISA screening tool were not evaluated  
12 during this study as this would have caused too high a burden of assessment on  
13 participants. Information on education level, stroke type, stroke severity and ocular history  
14 were not obtained for this study. These sources of information were not considered  
15 essential to this study as the primary aim was to determine if VISA could detect visual  
16 impairment regardless of patient/stroke demographics and regardless of whether visual  
17 impairment was new or pre-existent. These aspects would provide potentially useful  
18 discussion in a future implementation study of VISA. A further limitation is that we included  
19 a convenience sample of stroke survivors in this study. The study was designed as a  
20 pragmatic clinical study to fit in with daily clinical practice and with minimal disruption to  
21 service and care on the acute stroke unit. As a result the stroke team were potentially more  
22 likely to screen stroke survivors at risk for visual impairment. This may explain the higher  
23 prevalence rate of visual impairment for this study (85% VISA print and 77% VISA app) than  
24 that reported in a recent epidemiology study (73%) [4].  
25  
26  
27  
28  
29  
30  
31  
32  
33  
34  
35  
36  
37  
38  
39  
40

## 41 **Conclusions**

42 Validation of the VISA screening tool in either print or app format shows improved detection  
43 accuracy for detection of stroke-related visual impairment by clinicians involved in stroke  
44 care who are not specialists in vision problems and lack formal eye training. Where early  
45 visual impairment detection occurs, this facilitates prompt referral with fewer false positives  
46 and negatives. Clinicians reported acceptability of the VISA screening tool for its use in  
47 screening for presence of vision problems in stroke survivors. Referral sensitivity of >88%  
48 and specificity of >60% were found for the VISA screening with substantial inter-rater  
49 agreement for referral between VISA screening and specialist vision assessments. The VISA  
50 screening tool provides a standardised and validated method to screen for visual problems  
51  
52  
53  
54  
55  
56  
57  
58  
59  
60

1  
2  
3 following stroke and may further be of potential use for visual screening in other care  
4 settings such as neuro-rehabilitation.  
5  
6  
7

## 8 **Acknowledgements**

9  
10 We thank the VISable panel for their involvement in the design and monitoring of this study.  
11  
12 We thank the patients and staff at Arrowse Park Hospital, Bradford Teaching Hospital,  
13 Manchester University Hospital, Salford Royal Hospital and the Walton Centre; specifically  
14 Felicity Hale, Jennifer Lawrence, Sam Campbell, Claire Fowler, Imtiaz Nazir, Laura Stubbs,  
15 Abigail Kerr, Stephanie Wolff, Kim Cochrane, Tamsin Steward, Ella Henry, Carmel Noonan  
16 and Hayley Draper.  
17  
18  
19  
20  
21  
22

## 23 **References**

- 24 1. Hepworth LR, Rowe FJ, Walker MF, et al. Post-stroke visual impairment: a systematic  
25 literature review of types and recovery of visual conditions. *Ophthalmology Research* 2016;5(1).  
26 doi:10.9734/OR/2016/21767
- 27 2. Rowe F, VIS writing group. Vision In Stroke cohort: profile overview of visual impairment.  
28 *Brain and Behavior* 2017. doi:10.1002/brb3.771
- 29 3. Jones SA, Shinton RA. Improving outcome in stroke patients with visual problems. *Age and*  
30 *Ageing* 2006;35(6):560-5
- 31 4. Rowe FJ, Hepworth LR, Howard C, et al. High incidence and prevalence of visual problems  
32 after acute stroke: an epidemiology study with implications for service delivery. *PLoS One*  
33 2019;14(3). doi:10.1371/journal.pone.0213035
- 34 5. Stroke Association. State of the nation: stroke statistics 2018 [Available from:  
35 [https://www.stroke.org.uk/system/files/sotn\\_2018.pdf](https://www.stroke.org.uk/system/files/sotn_2018.pdf).  
36
- 37 6. Hepworth LR, Rowe FJ. Visual impairment following stroke - the impact on quality of life: a  
38 systematic review. *Ophthalmology Research* 2016;5(2):1-15
- 39 7. Tsai S-Y, Cheng C-Y, Hsu W-M, et al. Association between visual impairment and depression  
40 in the elderly. *Journal of Formosan Medical Association* 2003;102(2):86-90
- 41 8. Chen CS, Lee AW, Clarke G, et al. Vision-related quality of life in patients with complete  
42 homonymous hemianopia post stroke. *Topics in Stroke Rehabilitation* 2009;16(6):445-53
- 43 9. Gall C, Lucklum J, Sabel BA, et al. Vision- and health-related quality of life in patients with  
44 visual field loss after postchiasmatic lesions. *Investigative Ophthalmology and Vision Science*  
45 2009;50(6):2765-76
- 46 10. Hanna KL, Hepworth LR, Rowe FJ. The treatment methods for post-stroke visual impairment:  
47 a systematic review. *Brain and Behavior* 2017;7(5). doi:10.1002/brb3.682
- 48 11. Rowe F, Walker M, Rockliffe J, et al. Delivery of high quality stroke and vision care:  
49 experiences of UK services. *Disability and Rehabilitation* 2016;38(8):813-7
- 50 12. Rowe FJ, VIS Group UK. Accuracy of referrals for visual assessment in a stroke population.  
51 *Eye* 2011;25(2):161-7
- 52 13. Rowe FJ, Walker M, Rockliffe J, et al. Care provision for poststroke visual impairment.  
53 *Journal of Stroke and Cerebrovascular Diseases* 2015;24(6):1131-44
- 54 14. Rowe FJ, Hepworth LR, Hanna KL, et al. Visual Impairment Screening Assessment (VISA) tool:  
55 pilot validation. *BMJ Open* 2018. doi:10.1136/bmjopen-2017-020562  
56  
57  
58  
59  
60

15. Cohen JF, Korevaar DA, Altman DG, et al. STARD 2015 guidelines for reporting diagnostic accuracy studies: explanation and elaboration. *BMJ Open* 2016;6(e012799). doi:10.1136/bmjopen-2016-012799
16. Intercollegiate Stroke Working Party. National clinical guideline for stroke. 5th ed. London: Royal College of Physicians; 2016.
17. British and Irish Orthoptic Society. Competency standards and professional practice guidelines: extended practitioner role London: British and Irish Orthoptic Society,, 2018.
18. Holeý EA, Feeley JL, Dixon J, et al. An exploration of the use of simple statistics to measure consensus and stability in Delphi studies. *BMC Medical Research Methodology* 2007;7(52). doi:10.1186/1471-2288-7-52
19. Bland JM, Altman DG. Statistical methods for assessing agreement between two methods of clinical measurement. *Lancet* 1986;327(8476):307-10
20. Bruckner CT, Yoder P. Interpreting Kappa in observational research: base rate matters. *American Journal of Mental Retardation* 2006;111(6):433-41
21. Hanna KL, Hepworth LR, Rowe FJ. Screening methods for post-stroke visual impairment: a systematic review. *Disability and Rehabilitation* 2017;39(25):2531-43
22. Jolly N, Macfarlane A, Heard R. Towards gaining the best information about vision to assist the recovery of a patient with stroke. *Strabismus* 2013;21(2):145-9
23. Quinn TJ, Livingstone I, Weir A, et al. Accuracy and feasibility of an android-based digital assessment tool for post stroke visual disorders - the StrokeVision app. *Front Neurology* 2018;9(146). doi:10.3389/fneur.2018.00146
24. Rowe FJ. Who sees visual impairment following stroke? *Strabismus* 2010;18(2):37-40

**Figure 1:** Flow diagram of participant outcome for VISA screening and orthoptic full assessment.

Figure 1: Flow diagram of participant outcome for VISA screening and orthoptic full assessment.

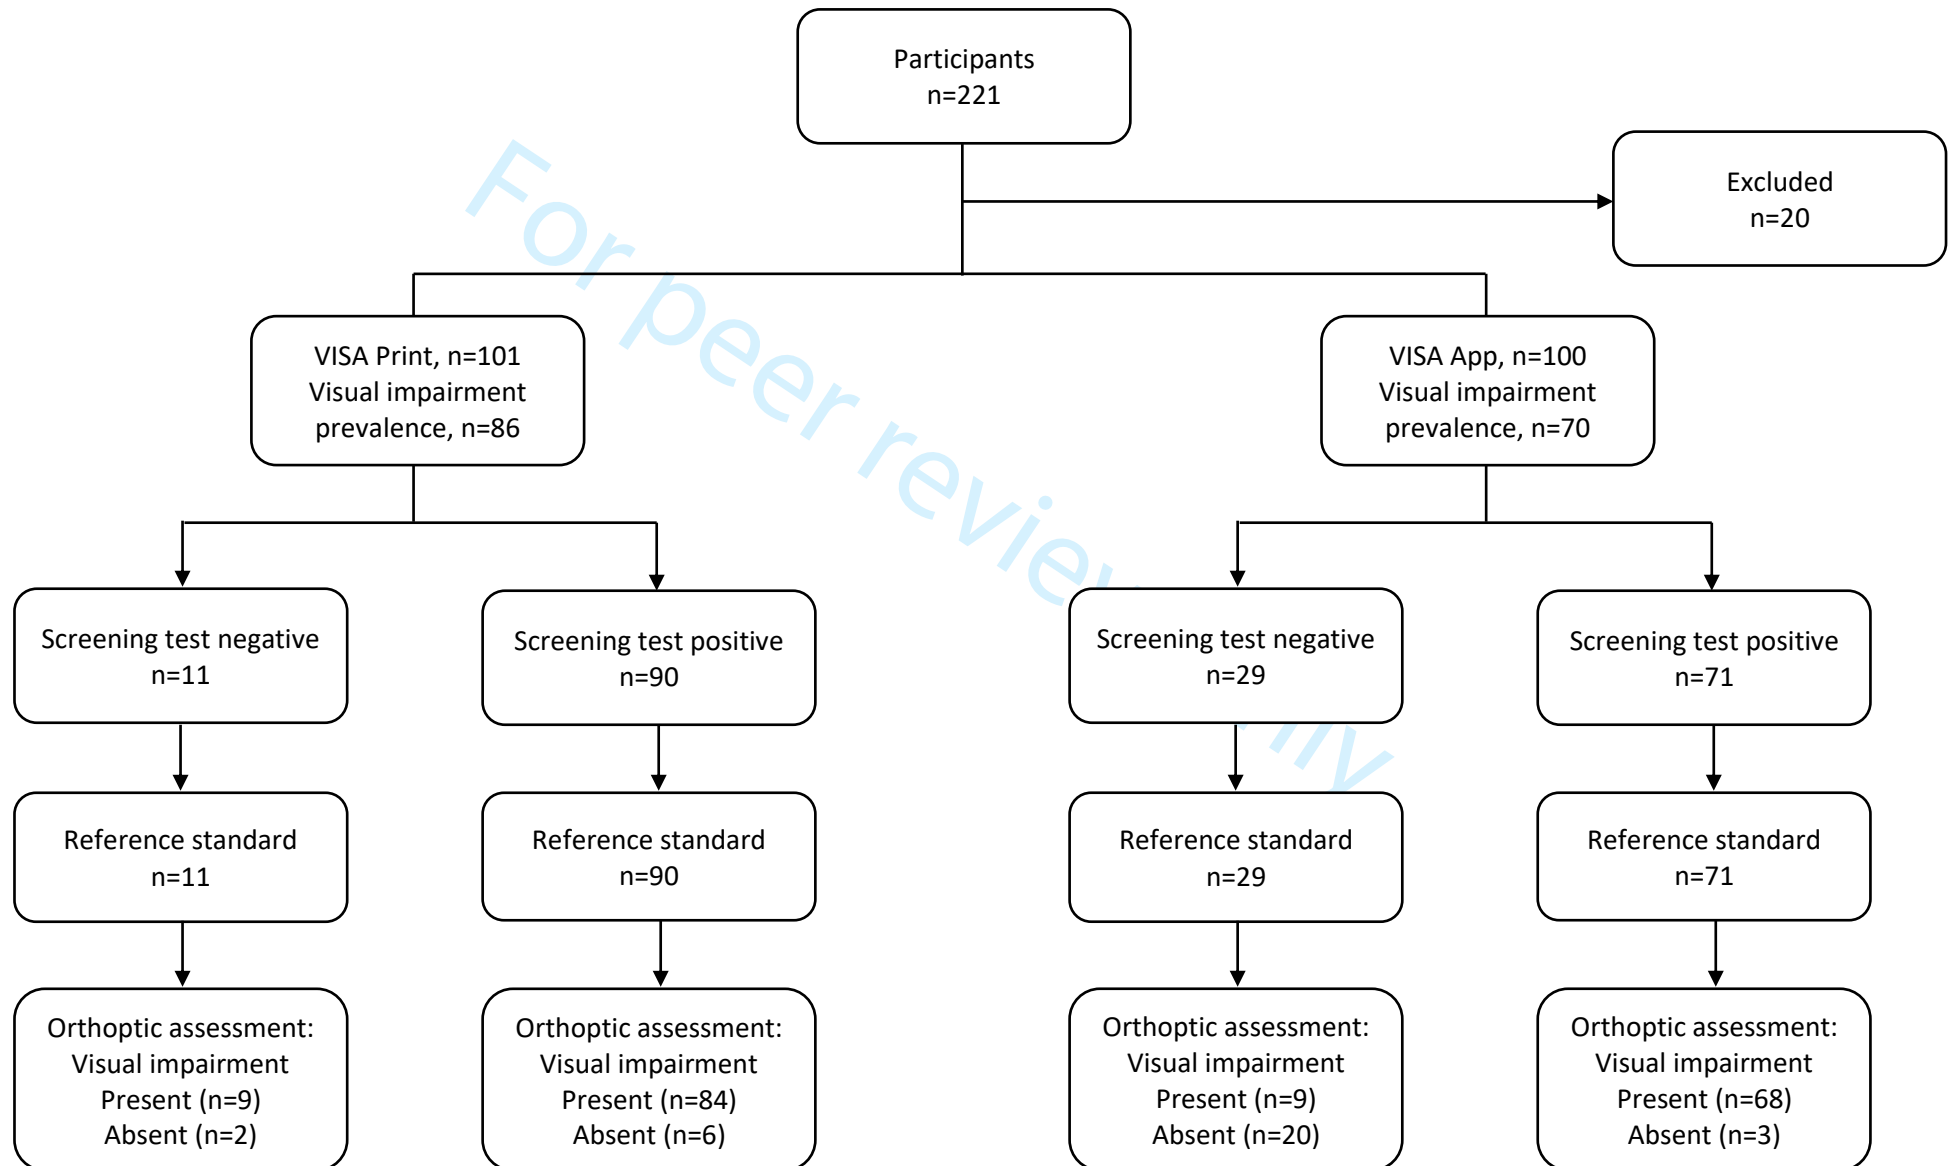



| 1  | Section & Topic          | No  | Item                                                                                                                                                   | Reported on page #                |
|----|--------------------------|-----|--------------------------------------------------------------------------------------------------------------------------------------------------------|-----------------------------------|
| 2  | <b>TITLE OR ABSTRACT</b> |     |                                                                                                                                                        |                                   |
| 3  |                          | 1   | Identification as a study of diagnostic accuracy using at least one measure of accuracy (such as sensitivity, specificity, predictive values, or AUC)  | 1                                 |
| 4  |                          |     |                                                                                                                                                        |                                   |
| 5  | <b>ABSTRACT</b>          |     |                                                                                                                                                        |                                   |
| 6  |                          | 2   | Structured summary of study design, methods, results, and conclusions (for specific guidance, see STARD for Abstracts)                                 | 2                                 |
| 7  |                          |     |                                                                                                                                                        |                                   |
| 8  | <b>INTRODUCTION</b>      |     |                                                                                                                                                        |                                   |
| 9  |                          | 3   | Scientific and clinical background, including the intended use and clinical role of the index test                                                     | 3                                 |
| 10 |                          | 4   | Study objectives and hypotheses                                                                                                                        | 3                                 |
| 11 |                          |     |                                                                                                                                                        |                                   |
| 12 | <b>METHODS</b>           |     |                                                                                                                                                        |                                   |
| 13 | <i>Study design</i>      | 5   | Whether data collection was planned before the index test and reference standard were performed (prospective study) or after (retrospective study)     | 3                                 |
| 14 |                          |     |                                                                                                                                                        |                                   |
| 15 | <i>Participants</i>      | 6   | Eligibility criteria                                                                                                                                   | 3-4                               |
| 16 |                          | 7   | On what basis potentially eligible participants were identified (such as symptoms, results from previous tests, inclusion in registry)                 | 4                                 |
| 17 |                          | 8   | Where and when potentially eligible participants were identified (setting, location and dates)                                                         | 3-4                               |
| 18 |                          | 9   | Whether participants formed a consecutive, random or convenience series                                                                                | 4                                 |
| 19 |                          |     |                                                                                                                                                        |                                   |
| 20 | <i>Test methods</i>      | 10a | Index test, in sufficient detail to allow replication                                                                                                  | 4                                 |
| 21 |                          | 10b | Reference standard, in sufficient detail to allow replication                                                                                          | 4                                 |
| 22 |                          | 11  | Rationale for choosing the reference standard (if alternatives exist)                                                                                  | N/A                               |
| 23 |                          | 12a | Definition of and rationale for test positivity cut-offs or result categories of the index test, distinguishing pre-specified from exploratory         | 3 – in previously published paper |
| 24 |                          | 12b | Definition of and rationale for test positivity cut-offs or result categories of the reference standard, distinguishing pre-specified from exploratory | 5                                 |
| 25 |                          | 13a | Whether clinical information and reference standard results were available to the performers/readers of the index test                                 | 5                                 |
| 26 |                          | 13b | Whether clinical information and index test results were available to the assessors of the reference standard                                          | 5                                 |
| 27 |                          |     |                                                                                                                                                        |                                   |
| 28 | <i>Analysis</i>          | 14  | Methods for estimating or comparing measures of diagnostic accuracy                                                                                    | 5                                 |
| 29 |                          | 15  | How indeterminate index test or reference standard results were handled                                                                                | 6                                 |
| 30 |                          | 16  | How missing data on the index test and reference standard were handled                                                                                 | 6                                 |
| 31 |                          | 17  | Any analyses of variability in diagnostic accuracy, distinguishing pre-specified from exploratory                                                      | N/A                               |
| 32 |                          | 18  | Intended sample size and how it was determined                                                                                                         | 5                                 |
| 33 |                          |     |                                                                                                                                                        |                                   |
| 34 | <b>RESULTS</b>           |     |                                                                                                                                                        |                                   |
| 35 | <i>Participants</i>      | 19  | Flow of participants, using a diagram                                                                                                                  | Figure 1                          |
| 36 |                          | 20  | Baseline demographic and clinical characteristics of participants                                                                                      | 6                                 |
| 37 |                          | 21a | Distribution of severity of disease in those with the target condition                                                                                 | 7-8                               |
| 38 |                          | 21b | Distribution of alternative diagnoses in those without the target condition                                                                            | N/A                               |
| 39 |                          | 22  | Time interval and any clinical interventions between index test and reference standard                                                                 | 5                                 |
| 40 | <i>Test results</i>      | 23  | Cross tabulation of the index test results (or their distribution) by the results of the reference standard                                            | Table 1 and 3                     |
| 41 |                          | 24  | Estimates of diagnostic accuracy and their precision (such as 95% confidence intervals)                                                                | 6-7 and Tables 1 and 3            |
| 42 |                          | 25  | Any adverse events from performing the index test or the reference standard                                                                            | 9                                 |
| 43 |                          |     |                                                                                                                                                        |                                   |
| 44 | <b>DISCUSSION</b>        |     |                                                                                                                                                        |                                   |
| 45 |                          | 26  | Study limitations, including sources of potential bias, statistical uncertainty, and generalisability                                                  | 12                                |
| 46 |                          | 27  | Implications for practice, including the intended use and clinical role of the index test                                                              | 11-12                             |
| 47 |                          |     |                                                                                                                                                        |                                   |
| 48 | <b>OTHER INFORMATION</b> |     |                                                                                                                                                        |                                   |
| 49 |                          | 28  | Registration number and name of registry                                                                                                               | N/A                               |
| 50 |                          | 29  | Where the full study protocol can be accessed                                                                                                          | N/A                               |
| 51 |                          | 30  | Sources of funding and other support; role of funders                                                                                                  | 1                                 |

1  
2  
3  
4  
5  
6  
7  
8  
9  
10  
11  
12  
13  
14  
15  
16  
17  
18  
19  
20  
21  
22  
23  
24  
25  
26  
27  
28  
29  
30  
31  
32  
33  
34  
35  
36  
37  
38  
39  
40  
41  
42  
43  
44  
45  
46  
47  
48  
49  
50  
51  
52  
53  
54  
55  
56  
57  
58  
59  
60

For peer review only



Supplement: bmjopen-2019-033639.draft_revisions.pdf [file bmjopen-2019-033639.draft_revisions.pdf]
